# Supplementary material
Source: bioRxiv or medRxiv preprint supplement (https://medrxiv.org/content/medrxiv/early/2020/12/16/2020.12.14.20248176/DC1/embed/media-1.pdf)
Supplement: Supplementary file [file media-1.pdf]

1 **Common genetic variants identify therapeutic targets for COVID-19 and**  
2 **individuals at high risk of severe disease**

3

4 J. E. Horowitz<sup>1†</sup>, J. A. Kosmicki<sup>1†</sup>, A. Damask<sup>1</sup>, D. Sharma<sup>1</sup>, G. H. L. Roberts<sup>2</sup>, A. E. Justice<sup>3</sup>, N.  
5 Banerjee<sup>1</sup>, M. V. Coignet<sup>2</sup>, A. Yadav<sup>1</sup>, J. B. Leader<sup>3</sup>, A. Marcketta<sup>1</sup>, D. S. Park<sup>2</sup>, R. Lanche<sup>1</sup>, E.  
6 Maxwell<sup>1</sup>, S. C. Knight<sup>2</sup>, X. Bai<sup>1</sup>, H. Guturu<sup>2</sup>, D. Sun<sup>1</sup>, A. Baltzell<sup>2</sup>, F. S. P. Kury<sup>1</sup>, J. D. Backman<sup>1</sup>,  
7 A. R. Girshick<sup>2</sup>, C. O’Dushlaine<sup>1</sup>, S. R. McCurdy<sup>2</sup>, R. Partha<sup>2</sup>, A. J. Mansfield<sup>1</sup>, D. A. Turissini<sup>2</sup>,  
8 A. H. Li<sup>1</sup>, M. Zhang<sup>2</sup>, J. Mbatchou<sup>1</sup>, K. Watanabe<sup>1</sup>, L. Gurski<sup>1</sup>, S. E. McCarthy<sup>1</sup>, A. Verma<sup>4</sup>, G.  
9 Sirugo<sup>4</sup>, Regeneron Genetics Center\*, M. D. Ritchie<sup>4</sup>, M. Jones<sup>1</sup>, S. Balasubramanian<sup>1</sup>, W. J.  
10 Salerno<sup>1</sup>, A. R. Shuldiner<sup>1</sup>, D. J. Rader<sup>4</sup>, T. Mirshahi<sup>3</sup>, A. E. Locke<sup>1</sup>, J. Marchini<sup>1</sup>, J. D. Overton<sup>1</sup>,  
11 D. J. Carey<sup>3</sup>, L. Habegger<sup>1</sup>, M. N. Cantor<sup>1</sup>, K. A. Rand<sup>2</sup>, E. L. Hong<sup>2</sup>, J. G. Reid<sup>1</sup>, C. A. Ball<sup>2</sup>, A.  
12 Baras<sup>1‡</sup>, G. R. Abecasis<sup>1‡</sup>, M. A. Ferreira<sup>1‡</sup>

13

14 From:

15 <sup>1</sup>Regeneron Genetics Center, 777 Old Saw Mill River Rd., Tarrytown, NY 10591, USA

16 <sup>2</sup>AncestryDNA, 1300 West Traverse Parkway, Lehi, UT 84043, USA

17 <sup>3</sup>Geisinger, Danville, PA, 17822, USA

18 <sup>4</sup>Department of Genetics, Perelman School of Medicine, University of Pennsylvania, Philadelphia,  
19 PA, 19104, USA

20

21 \*A complete list of investigators is provided in the Supplementary Appendix.

22 †J. A. Kosmicki and J. E. Horowitz contributed equally to this manuscript.

23 ‡A. Baras, G. R. Abecasis and M. A. Ferreira jointly supervised this work.

24 Correspondence to: [manuel.ferreira@regeneron.com](mailto:manuel.ferreira@regeneron.com) and [goncalo.abecasis@regeneron.com](mailto:goncalo.abecasis@regeneron.com)

25

26 **This research has been conducted using the UK Biobank Resource (Project 26041)**

## SUPPLEMENTARY FIGURES

A.

*COVID-19 positive hospitalized vs COVID-19 positive and not hospitalized*

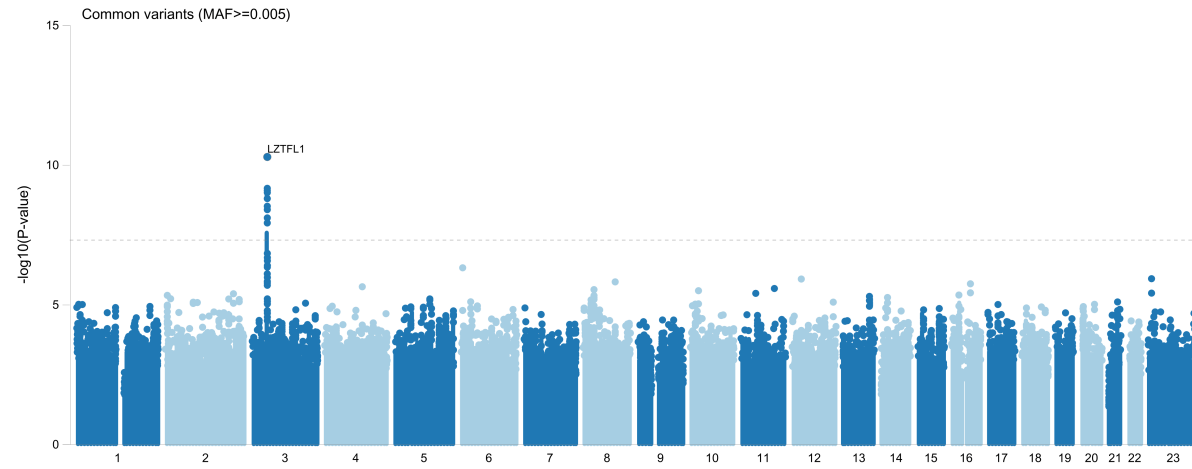

B.

*COVID-19 positive severe vs COVID-19 positive and not hospitalized*

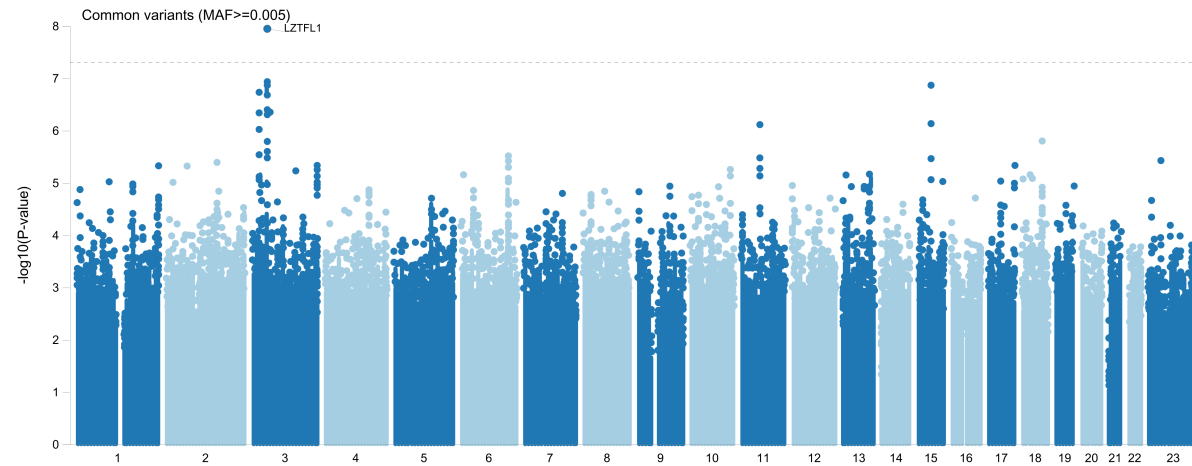

**Supplementary Figure 1.** Summary of association results from the meta-analysis of two phenotypes related to COVID-19 severity.

A.

5q34  
rs79833209:T  
*CCNG1*

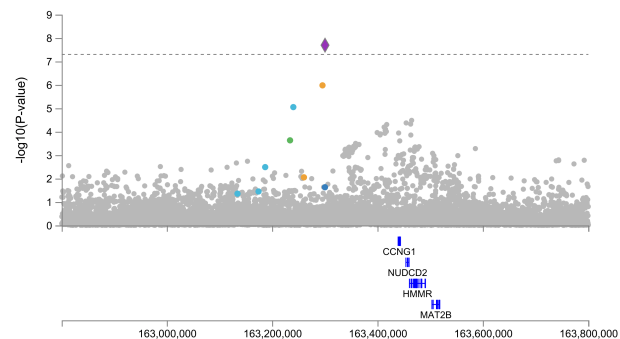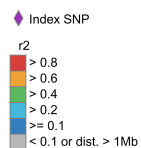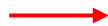

| STUDY                              | N CASES           |  | N CONTROLS              |  | OR [95% CI]                | PVALUE         | AAF           |
|------------------------------------|-------------------|--|-------------------------|--|----------------------------|----------------|---------------|
|                                    | RR RA AA          |  | RR RA AA                |  |                            |                |               |
| UKB_500K_Genotyped_EUR             | 1083 61 1         |  | 414701 19114 223        |  | 1.27 [0.959,1.68]          | 0.095          | 0.0226        |
| UKB_500K_Genotyped_SAS             | 45 4 0            |  | 10190 299 3             |  | 3.255 [1.092,9.696]        | 0.034          | 0.0151        |
| ANCESTRY_Freeze_Two_EUR            | 488 <100 <100     |  | 63475 2830 <100         |  | 1.645 [1.123,2.408]        | 0.011          | 0.0226        |
| ANCESTRY_Freeze_Two_AFR            | <100 <100 <100    |  | 2857 <100 <100          |  | 1.582 [0.149,16.763]       | 0.703          | 0.0076        |
| ANCESTRY_Freeze_Two_AMR            | <100 <100 <100    |  | 6201 163 <100           |  | 1.38 [0.383,4.975]         | 0.622          | 0.0154        |
| UPENN_Freeze_One_AFR               | 67 0 0            |  | 8646 92 0               |  | 0.374 [0.033,4.179]        | 0.425          | 0.0053        |
| GHS_Freeze_145_Genotyped_EUR       | 153 12 0          |  | 107891 4951 35          |  | 1.742 [0.829,3.659]        | 0.143          | 0.0226        |
| external_Ellinghaus_NEJM_2020_EUR  | 1533 75 0         |  | 2115 88 0               |  | 1.18 [0.727,1.917]         | 0.503          | 0.0204        |
| external_Pairo-Castineira_2020_EUR | 1555 118 2        |  | 8041 334 3              |  | 1.822 [1.419,2.34]         | 2.5e-06        | 0.0204        |
| <b>META</b>                        | <b>5072 308 4</b> |  | <b>624117 27910 296</b> |  | <b>1.544 [1.326,1.796]</b> | <b>2.0e-08</b> | <b>0.0219</b> |

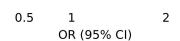

B.

16q24.3  
rs4782327:G  
*ACSF3*

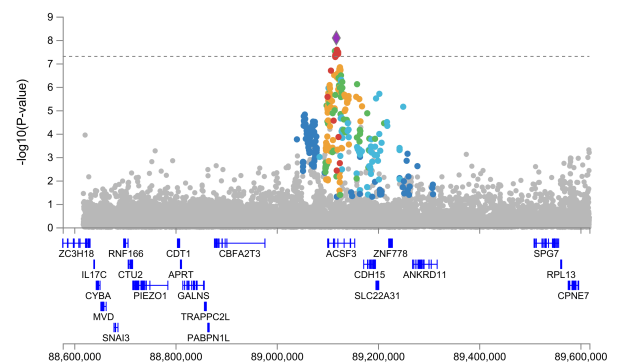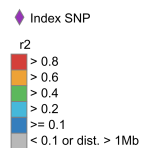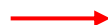

| STUDY                              | N CASES              |  | N CONTROLS                 |  | OR [95% CI]               | PVALUE         | AAF          |
|------------------------------------|----------------------|--|----------------------------|--|---------------------------|----------------|--------------|
|                                    | RR RA AA             |  | RR RA AA                   |  |                           |                |              |
| UKB_500K_Genotyped_EUR             | 666 410 69           |  | 271167 143678 19193        |  | 1.196 [1.085,1.319]       | 3.1e-04        | 0.21         |
| UKB_500K_Genotyped_AFR             | 28 32 14             |  | 3920 4246 1139             |  | 1.282 [0.912,1.804]       | 0.153          | 0.351        |
| UKB_500K_Genotyped_SAS             | 18 20 11             |  | 4409 4708 1375             |  | 1.435 [0.944,2.182]       | 0.091          | 0.356        |
| ANCESTRY_Freeze_Two_EUR            | 302 186 <100         |  | 41287 22083 2965           |  | 1.19 [1.03,1.374]         | 0.018          | 0.211        |
| ANCESTRY_Freeze_Two_AFR            | <100 <100 <100       |  | 1361 1250 285              |  | 1.381 [0.944,2.022]       | 0.096          | 0.316        |
| ANCESTRY_Freeze_Two_AMR            | <100 <100 <100       |  | 4157 1992 217              |  | 1.362 [0.917,2.022]       | 0.126          | 0.191        |
| UPENN_Freeze_One_AFR               | 30 31 6              |  | 3712 3980 1046             |  | 0.84 [0.581,1.213]        | 0.352          | 0.354        |
| GHS_Freeze_145_Genotyped_EUR       | 110 49 6             |  | 71184 36945 4748           |  | 0.875 [0.666,1.15]        | 0.339          | 0.212        |
| external_Ellinghaus_NEJM_2020_EUR  | 936 582 90           |  | 1348 751 104               |  | 1.116 [0.959,1.298]       | 0.156          | 0.218        |
| external_Pairo-Castineira_2020_EUR | 945 626 103          |  | 5125 2856 398              |  | 1.188 [1.076,1.313]       | 7.0e-04        | 0.218        |
| <b>META</b>                        | <b>3109 2002 346</b> |  | <b>407670 222489 31470</b> |  | <b>1.171 [1.11,1.236]</b> | <b>8.2e-09</b> | <b>0.216</b> |

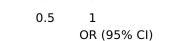

C.

19q13.41  
rs12461764:G  
*FPR1*

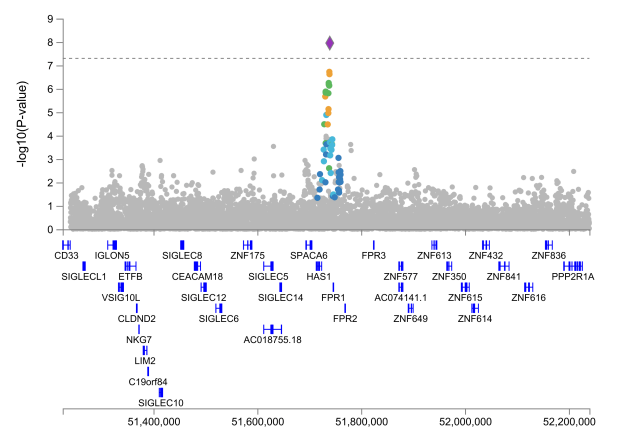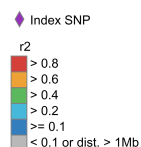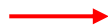

| STUDY                             | N CASES              |  | N CONTROLS                 |  | OR [95% CI]               | PVALUE         | AAF          |
|-----------------------------------|----------------------|--|----------------------------|--|---------------------------|----------------|--------------|
|                                   | RR RA AA             |  | RR RA AA                   |  |                           |                |              |
| UKB_500K_Genotyped_EUR            | 446 530 169          |  | 183733 197192 53113        |  | 1.142 [1.049,1.243]       | 0.002          | 0.35         |
| UKB_500K_Genotyped_AFR            | 39 31 4              |  | 5258 3478 569              |  | 1.13 [0.77,1.66]          | 0.532          | 0.248        |
| UKB_500K_Genotyped_SAS            | 20 18 11             |  | 4278 4845 1369             |  | 1.176 [0.778,1.776]       | 0.442          | 0.362        |
| ANCESTRY_Freeze_Two_EUR           | 185 252 <100         |  | 28233 30098 8004           |  | 1.245 [1.097,1.413]       | 6.6e-04        | 0.348        |
| ANCESTRY_Freeze_Two_AFR           | <100 <100 <100       |  | 1526 1171 199              |  | 1.204 [0.799,1.814]       | 0.375          | 0.274        |
| ANCESTRY_Freeze_Two_AMR           | <100 <100 <100       |  | 2454 3059 853              |  | 1.074 [0.775,1.488]       | 0.669          | 0.374        |
| UPENN_Freeze_One_AFR              | 34 25 8              |  | 4858 3372 508              |  | 1.283 [0.843,1.952]       | 0.245          | 0.264        |
| GHS_Freeze_145_Genotyped_EUR      | 65 76 24             |  | 48584 51001 13292          |  | 1.125 [0.891,1.42]        | 0.324          | 0.348        |
| external_Ellinghaus_NEJM_2020_EUR | 576 773 259          |  | 933 1002 269               |  | 1.25 [1.089,1.435]        | 0.002          | 0.35         |
| <b>META</b>                       | <b>1431 1770 582</b> |  | <b>279857 295218 78176</b> |  | <b>1.181 [1.116,1.25]</b> | <b>1.1e-08</b> | <b>0.346</b> |

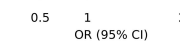

**Supplementary Figure 2.** Association with three novel loci identified in this study.

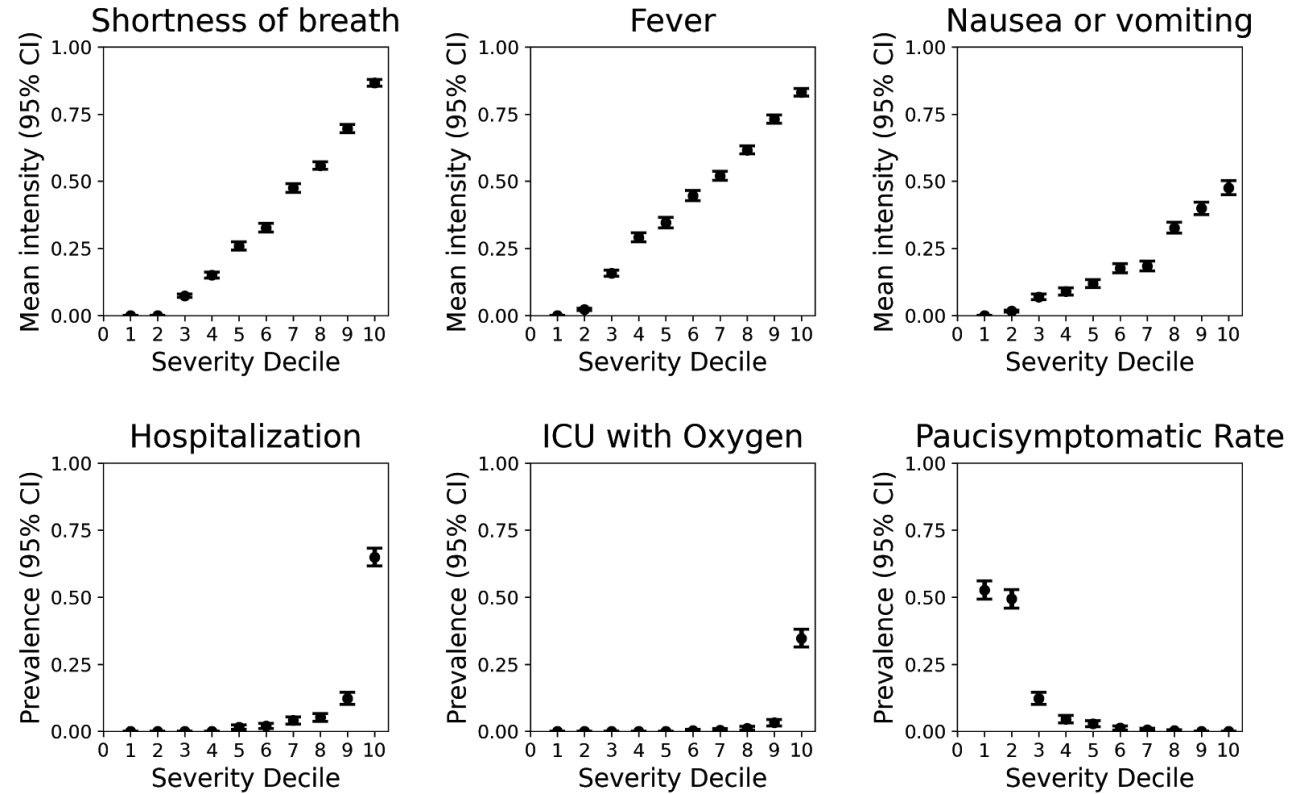

**Supplementary Figure 3. Association between the continuous severity score and key individual measures of severity.** The continuous severity score was derived from the first principal component across nine survey fields related to COVID-19 clinical outcomes, including three symptoms, hospitalization, ICU admittance, and other severe complications due to COVID-19 illness (Methods). Plots reflect mean symptom severity (top three panels) or incident prevalence (bottom three panels) for several fields as a function of ascending severity decile. Symptom information was encoded as follows: 0=None, 0.2=Very Mild, 0.4=Mild, 0.6=Moderate, 0.8=Severe, and 1.0=Very Severe. A paucisymptomatic case corresponds to reporting symptoms of mild intensity or less for any of the symptom severity questions.

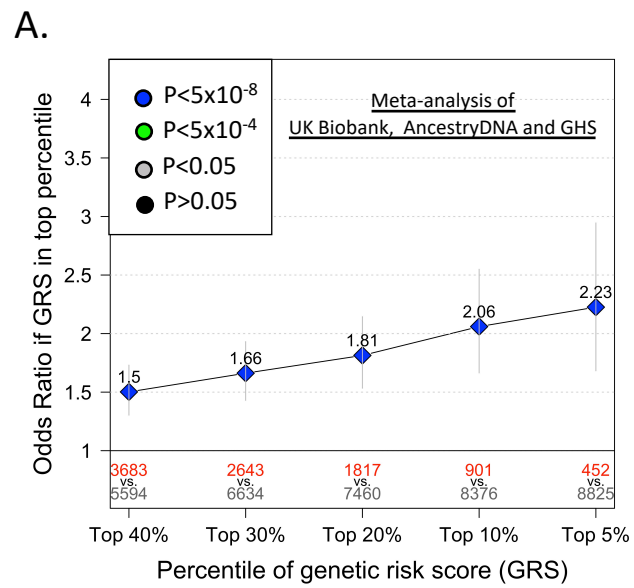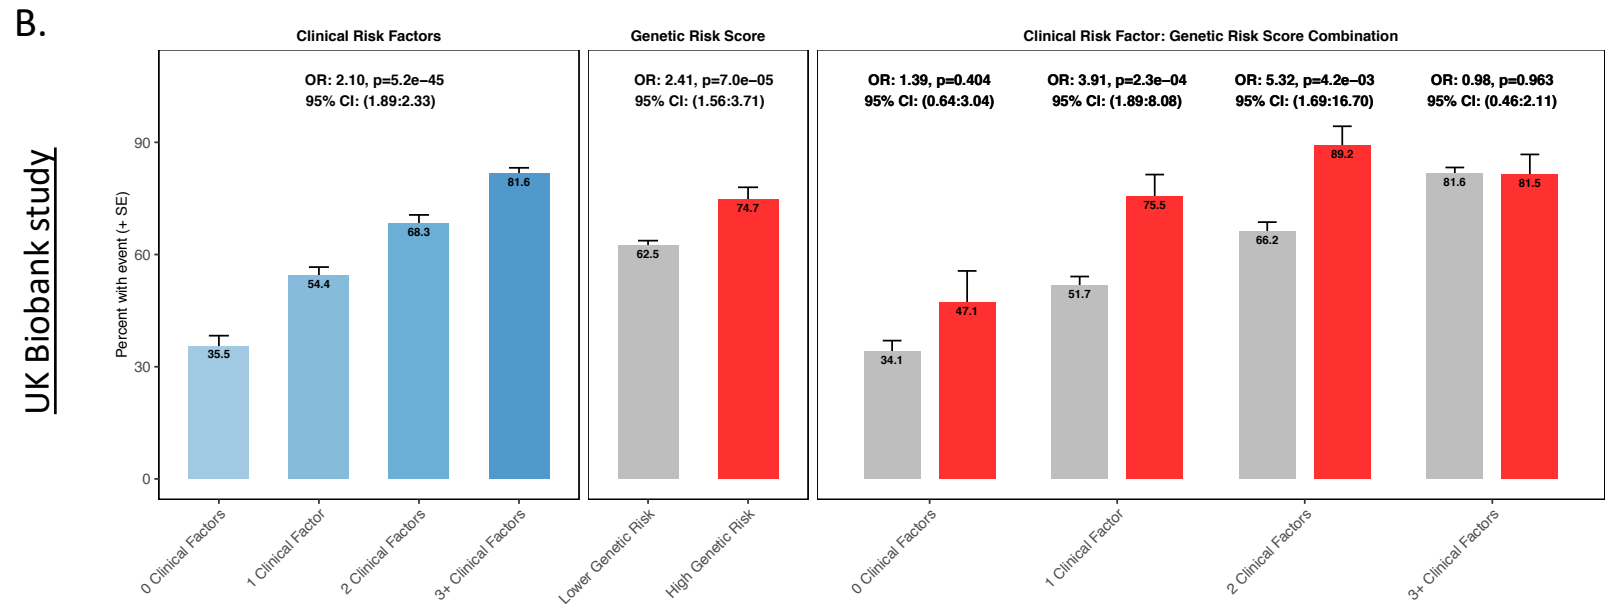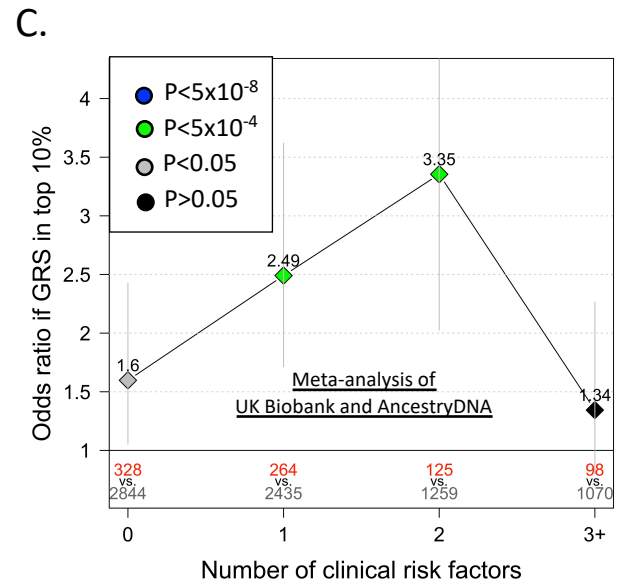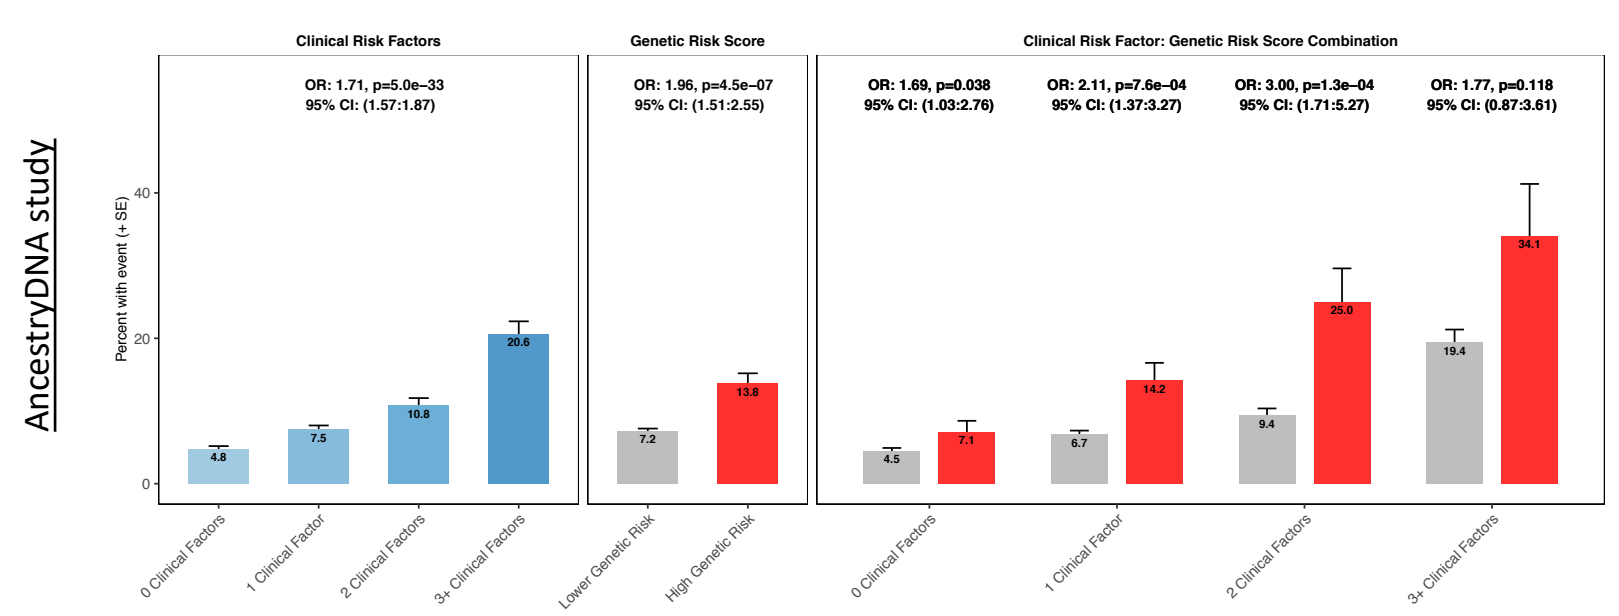

**Supplementary Figure 4. Association between a four-SNP genetic risk score (GRS) and risk of hospitalization among COVID-19 cases of European ancestry.**

0 Clinical Risk Factors    2 Clinical Risk Factors    Lower Genetic Risk (Bottom 90% of GRS)  
 1 Clinical Risk Factor    3+ Clinical Risk Factors    High Genetic Risk (Top 10% of GRS)

## SUPPLEMENTARY TABLES

**Supplementary Table 1. Breakdown of COVID-19 status across the four studies included in the analysis.**

| COVID-19 status | Positive qPCR or serology for SARS-CoV-2 | ICD10 U07 diagnosis or hospitalization | Severe COVID-19 (ventilation or death) | Negative qPCR or serology test for SARS-CoV-2 | Sample size   |               |             |             |                |
|-----------------|------------------------------------------|----------------------------------------|----------------------------------------|-----------------------------------------------|---------------|---------------|-------------|-------------|----------------|
|                 |                                          |                                        |                                        |                                               | AncestryDNA   | UK Biobank    | GHS         | PMBB        | Total          |
| Positive        | Yes                                      | Yes                                    | Yes                                    | Yes or No or NA                               | 307           | 251           | 36          | 27          | 621            |
|                 | Yes                                      | Yes                                    | No or NA                               | Yes or No or NA                               | 368           | 642           | 129         | 40          | 1,179          |
|                 | Yes                                      | No or NA                               | Yes                                    | Yes or No or NA                               | 0             | 42            | 0           | 0           | 42             |
|                 | Yes                                      | No or NA                               | No or NA                               | Yes or No or NA                               | 7,658         | 777           | 689         | 99          | 9,223          |
|                 | No or NA                                 | Yes                                    | Yes                                    | No or NA                                      | 0             | 16            | 0           | 0           | 16             |
|                 | No or NA                                 | Yes                                    | No or NA                               | No or NA                                      | 0             | 92            | 0           | 0           | 92             |
|                 | No or NA                                 | No or NA                               | Yes                                    | No or NA                                      | 0             | 122           | 0           | 0           | 122            |
|                 | No or NA                                 | Yes                                    | Yes                                    | Yes                                           | 0             | 15            | 0           | 0           | 15             |
|                 | No or NA                                 | Yes                                    | No or NA                               | Yes                                           | 0             | 150           | 0           | 0           | 150            |
|                 | No or NA                                 | No or NA                               | Yes                                    | Yes                                           | 0             | 11            | 0           | 0           | 11             |
|                 |                                          |                                        |                                        |                                               | Total = 8,333 | Total = 2,003 | Total = 854 | Total = 166 | Total = 11,356 |
| Negative        | No or NA                                 | No or NA                               | No or NA                               | Yes                                           | 22,131        | 15,653        | 16,148      | 959         | 54,891         |
| Unknown         | NA                                       | No or NA                               | No or NA                               | NA                                            | 53,466        | 438,182       | 96,729      | 7,779       | 596,156        |
| Total           |                                          |                                        |                                        |                                               | 83,930        | 455,838       | 113,731     | 8,904       | 662,403        |



**Supplementary Table 2. Demographics and clinical characteristics of study participants.**

| Demographics                  | COVID-19 Positive |                  | Covid-19 Negative or Unknown |
|-------------------------------|-------------------|------------------|------------------------------|
|                               | Hospitalized      | Not Hospitalized |                              |
| <b>AncestryDNA</b>            |                   |                  |                              |
| Total N                       | 675               | 7658             | 75597                        |
| AFR ancestry, n (%)           | <100              | 509 (6.6%)       | 2896 (3.8%)                  |
| AMR ancestry, n (%)           | <100              | 1045 (13.6%)     | 6366 (8.4%)                  |
| EUR ancestry, n (%)           | 522 (77.3%)       | 6104 (79.7%)     | 66335 (87.7%)                |
| Average Age, y (% >60y)       | 56.13 (42.1%)     | 48.59 (23.4%)    | 52.75 (35.6%)                |
| Female, n (%)                 | 400 (59.3%)       | 5032 (65.7%)     | 51442 (68.0%)                |
| Hypertension, n (%)           | 223 (33.0%)       | 1492 (19.5%)     | 17179 (22.7%)                |
| Cardiovascular Disease, n (%) | <100              | 304 (4.0%)       | 3946 (5.2%)                  |
| Type 2 Diabetes, n (%)        | 144 (21.3%)       | 637 (8.3%)       | 7219 (9.5%)                  |
| Chronic kidney disease, n (%) | <100              | <100             | 1251 (1.7%)                  |
| Asthma, n (%)                 | 145 (21.5%)       | 1130 (14.8%)     | 10747 (14.2%)                |
| COPD, n (%)                   | <100              | 140 (1.8%)       | 2153 (2.8%)                  |
| <b>UK Biobank</b>             |                   |                  |                              |
| Total N                       | 1268              | 735              | 453835                       |
| AFR ancestry, n (%)           | 74 (5.8%)         | 41 (5.6%)        | 9305 (2.1%)                  |
| EUR ancestry, n (%)           | 1145 (90.3%)      | 652 (88.7%)      | 434038 (95.6%)               |
| SAS ancestry, n (%)           | 49 (3.9%)         | 42 (5.7%)        | 10492 (2.3%)                 |
| Average Age, y (% >60y)       | 62 (57%)          | 50 (23%)         | 57 (36%)                     |
| Female, n (%)                 | 544 (40.5%)       | 451 (58.0%)      | 260908 (55.3%)               |
| Hypertension, n (%)           | 626 (46.6%)       | 193 (24.8%)      | 109878 (23.2%)               |
| Cardiovascular Disease, n (%) | 185 (13.7%)       | 44 (5.6%)        | 27758 (5.8%)                 |
| Type 2 Diabetes, n (%)        | 267 (18.7%)       | 74 (9.5%)        | 32594 (6.9%)                 |
| Chronic kidney disease, n (%) | 77 (5.7%)         | 15 (1.9%)        | 7188 (1.5%)                  |
| Asthma, n (%)                 | 217 (16.1%)       | 123 (15.8%)      | 67210 (14.2%)                |
| COPD, n (%)                   | 137 (10.2%)       | 22 (2.8%)        | 11703 (2.4%)                 |
| <b>GHS</b>                    |                   |                  |                              |
| Total N                       | 165               | 689              | 112877                       |
| EUR ancestry, n (%)           | 165 (100%)        | 689 (100%)       | 112877 (100%)                |
| Average Age, y (% >60y)       | 65.8 (71.5%)      | 53.6 (36.4%)     | 55.2 (42.7%)                 |
| Female, n (%)                 | 101 (56.4%)       | 510 (67.1%)      | 76314 (62.8%)                |
| Hypertension, n (%)           | 138 (77.1%)       | 381 (50.1%)      | 58857 (48.5%)                |

|                                      |               |               |               |
|--------------------------------------|---------------|---------------|---------------|
| <b>Cardiovascular Disease, n (%)</b> | 76 (42.5%)    | 117 (15.4%)   | 18580 (15.3%) |
| <b>Type 2 Diabetes, n (%)</b>        | 77 (43.0%)    | 177 (23.3%)   | 26200 (21.6%) |
| <b>Chronic kidney disease, n (%)</b> | 69 (38.5%)    | 104 (13.7%)   | 15584 (12.8%) |
| <b>Asthma, n (%)</b>                 | 16 (8.9%)     | 59 (7.78%)    | 7839 (6.5%)   |
| <b>COPD, n (%)</b>                   | 49 (27.4%)    | 73 (9.6%)     | 11802 (9.7%)  |
| <b>PMBB</b>                          |               |               |               |
| <b>Total N</b>                       | 67            | 99            | 8738          |
| <b>AFR ancestry, n (%)</b>           | 67 (100%)     | 99 (100%)     | 8738 (100%)   |
| <b>Average Age, y (% &gt;60y)</b>    | 62.58 (61.2%) | 47.64 (19.2%) | 56.74 (45.6%) |
| <b>Female, n (%)</b>                 | 38 (56.7%)    | 72 (72.7%)    | 5495 (62.9%)  |
| <b>Hypertension, n (%)</b>           | 59 (88.1%)    | 52 (52.5%)    | 5497 (62.9%)  |
| <b>Cardiovascular Disease, n (%)</b> | 40 (59.7%)    | 17 (17.2%)    | 2557 (29.3%)  |
| <b>Type 2 Diabetes, n (%)</b>        | 50 (74.6%)    | 31 (31.3%)    | 2973 (34.1%)  |
| <b>Chronic kidney disease, n (%)</b> | 42 (62.7%)    | 13 (13.1%)    | 2093 (24.0%)  |
| <b>Asthma, n (%)</b>                 | 18 (26.9%)    | 23 (23.2%)    | 1762 (20.2%)  |
| <b>COPD, n (%)</b>                   | 20 (29.9%)    | 8 (8.1%)      | 1037 (11.9%)  |

**Supplementary Table 3. Definitions used for the seven COVID-19 phenotypes analyzed.**

| Broad phenotype category                                      | Phenotype                                                                     | Case/control group  | Definition          |                |                | Sample size with genetic data |            |         |         |         |
|---------------------------------------------------------------|-------------------------------------------------------------------------------|---------------------|---------------------|----------------|----------------|-------------------------------|------------|---------|---------|---------|
|                                                               |                                                                               |                     | COVID-19 status     | Hospitalized   | Severe disease | AncestryDNA                   | UK Biobank | GHS     | PMBB    | Total   |
| Risk of infection                                             | COVID-19 positive vs. COVID-19 negative or unknown                            | Cases               | Positive            | Yes, No or NA  | Yes, No or NA  | 8,333                         | 2,003      | 854     | 166     | 11,356  |
|                                                               |                                                                               | Controls            | Negative or unknown | No or NA       | No or NA       | 75,597                        | 453,835    | 112,877 | 8,738   | 651,047 |
|                                                               | COVID-19 positive vs. COVID-19 negative                                       | Cases               | Positive            | Yes, No or NA  | Yes, No or NA  | 8,333                         | 2,003      | 854     | 166     | 11,356  |
|                                                               |                                                                               | Controls            | Negative            | No or NA       | No or NA       | 22,131                        | 15,653     | 16,148  | 959     | 54,891  |
|                                                               | COVID-19 positive and not hospitalized vs. COVID-19 negative or unknown       | Cases               | Positive            | No             | No             | 7,658                         | 735        | 689     | 99      | 9,181   |
|                                                               |                                                                               | Controls            | Negative or unknown | No or NA       | No or NA       | 75,597                        | 453,835    | 112,877 | 8,738   | 651,047 |
|                                                               | COVID-19 positive and hospitalized vs. COVID-19 negative or unknown           | Cases               | Positive            | Yes (or death) | Yes, No or NA  | 675                           | 1,268      | 165     | 67      | 2,175   |
|                                                               |                                                                               | Controls            | Negative or unknown | No or NA       | No or NA       | 75,597                        | 453,835    | 112,877 | 8,738   | 651,047 |
| COVID-19 positive and severe vs. COVID-19 negative or unknown | Cases                                                                         | Positive            | Yes, No or NA       | Yes            | 307            | 504                           | 36         | 27      | 874     |         |
|                                                               | Controls                                                                      | Negative or unknown | No or NA            | No or NA       | 75,597         | 443,343                       | 112,877    | 8,738   | 640,555 |         |
| Risk of adverse outcomes amongst infected individuals         | COVID-19 positive and hospitalized vs. COVID-19 positive and not hospitalized | Cases               | Positive            | Yes (or death) | Yes, No or NA  | 675                           | 1,145      | 165     | 67      | 2,052   |
|                                                               |                                                                               | Controls            | Positive            | No             | No             | 7,658                         | 652        | 689     | 99      | 9,098   |
|                                                               | COVID-19 positive and severe vs. COVID-19 positive and not hospitalized       | Cases               | Positive            | Yes, No or NA  | Yes            | 307                           | 472        | 36      | 27      | 842     |
|                                                               |                                                                               | Controls            | Positive            | No             | No             | 7,658                         | 652        | 689     | 99      | 9,098   |

**Supplementary Table 4. Genomic inflation factor (lambda) across the seven COVID-19 phenotypes at**

| Index | Phenotype                                                              | Study                    | N cases | N controls | Total N | N variants | Lambda |
|-------|------------------------------------------------------------------------|--------------------------|---------|------------|---------|------------|--------|
| 1     | COVID19 positive<br>vs<br>COVID19 negative or unknown                  | Meta-analysis            | 11356   | 651047     | 662403  | 23988898   | 1.012  |
|       |                                                                        | UKB 500K Genotyped EUR   | 1797    | 434038     | 435835  | 11528382   | 1.009  |
|       |                                                                        | GHS Freeze 145 EUR       | 854     | 112877     | 113731  | 10493220   | 1.012  |
|       |                                                                        | ANCESTRY Freeze Two EUR  | 6626    | 66335      | 72961   | 9101390    | 1.014  |
|       |                                                                        | UKB 500K Genotyped SAS   | 91      | 10492      | 10583   | 12206386   | 1.001  |
|       |                                                                        | UKB 500K Genotyped AFR   | 115     | 9305       | 9420    | 20335962   | 1.011  |
|       |                                                                        | UPENN Freeze One HRC AFR | 166     | 8738       | 8904    | 17931891   | 0.983  |
|       |                                                                        | ANCESTRY Freeze Two AMR  | 1130    | 6366       | 7496    | 10295686   | 1.045  |
|       |                                                                        | ANCESTRY Freeze Two AFR  | 577     | 2896       | 3473    | 16485981   | 1.003  |
| 2     | COVID19 positive<br>vs<br>COVID19 negative                             | Meta-analysis            | 11356   | 54891      | 66247   | 23551062   | 0.994  |
|       |                                                                        | ANCESTRY Freeze Two EUR  | 6626    | 19058      | 25684   | 9083691    | 1.028  |
|       |                                                                        | GHS Freeze 145 EUR       | 854     | 16148      | 17002   | 10447535   | 1.003  |
|       |                                                                        | UKB 500K Genotyped EUR   | 1797    | 14839      | 16636   | 11468258   | 1.038  |
|       |                                                                        | ANCESTRY Freeze Two AMR  | 1130    | 2041       | 3171    | 10268736   | 1.043  |
|       |                                                                        | ANCESTRY Freeze Two AFR  | 577     | 1032       | 1609    | 16341768   | 0.986  |
|       |                                                                        | UPENN Freeze One HRC AFR | 166     | 959        | 1125    | 17367888   | 0.980  |
|       |                                                                        | UKB 500K Genotyped SAS   | 91      | 426        | 517     | 11415240   | 0.860  |
|       |                                                                        | UKB 500K Genotyped AFR   | 115     | 388        | 503     | 19047316   | 0.917  |
| 3     | COVID19 positive not hospitalized<br>vs<br>COVID19 negative or unknown | Meta-analysis            | 9181    | 651047     | 660228  | 23985875   | 1.031  |
|       |                                                                        | UKB 500K Genotyped EUR   | 652     | 434038     | 434690  | 11528319   | 1.008  |
|       |                                                                        | GHS Freeze 145 EUR       | 689     | 112877     | 113566  | 10493176   | 1.013  |
|       |                                                                        | ANCESTRY Freeze Two EUR  | 6104    | 66335      | 72439   | 9100850    | 1.024  |
|       |                                                                        | UKB 500K Genotyped SAS   | 42      | 10492      | 10534   | 12205146   | 1.040  |
|       |                                                                        | UKB 500K Genotyped AFR   | 41      | 9305       | 9346    | 20332630   | 1.075  |
|       |                                                                        | UPENN Freeze One HRC AFR | 99      | 8738       | 8837    | 17925812   | 0.977  |
|       |                                                                        | ANCESTRY Freeze Two AMR  | 1045    | 6366       | 7411    | 10292341   | 1.040  |
|       |                                                                        | ANCESTRY Freeze Two AFR  | 509     | 2896       | 3405    | 16481786   | 0.990  |
| 4     | COVID19 positive hospitalized<br>vs<br>COVID19 negative or unknown     | Meta-analysis            | 2175    | 651047     | 653222  | 23990017   | 1.035  |
|       |                                                                        | UKB 500K Genotyped EUR   | 1145    | 434038     | 435183  | 11528367   | 1.010  |
|       |                                                                        | GHS Freeze 145 EUR       | 165     | 112877     | 113042  | 10492982   | 0.970  |
|       |                                                                        | ANCESTRY Freeze Two EUR  | 522     | 66335      | 66857   | 9097104    | 0.998  |
|       |                                                                        | UKB 500K Genotyped SAS   | 49      | 10492      | 10541   | 12205345   | 1.049  |
|       |                                                                        | UKB 500K Genotyped AFR   | 74      | 9305       | 9379    | 20334342   | 1.024  |
|       |                                                                        | UPENN Freeze One HRC AFR | 67      | 8738       | 8805    | 17868390   | 1.103  |
|       |                                                                        | ANCESTRY Freeze Two AMR  | <100    | 6366       | NA      | 10241678   | 0.990  |
|       |                                                                        | ANCESTRY Freeze Two AFR  | <100    | 2896       | NA      | 16454783   | 0.984  |
|       | COVID19 positive severe                                                | Meta-analysis            | 838     | 527678     | 528516  | 22717856   | 1.003  |
|       |                                                                        | UKB 500K Genotyped EUR   | 472     | 434038     | 434510  | 11528295   | 1.014  |
|       |                                                                        | ANCESTRY Freeze Two EUR  | 236     | 66335      | 66571   | 9096792    | 0.992  |

|   |                                                                          |                          |      |      |       |          |       |
|---|--------------------------------------------------------------------------|--------------------------|------|------|-------|----------|-------|
| 5 | vs<br>COVID19 negative or unknown                                        | UKB 500K Genotyped AFR   | 32   | 9305 | 9337  | 20332102 | 1.039 |
|   |                                                                          | UPENN Freeze One HRC AFR | 27   | 8738 | 8765  | 17920931 | 0.962 |
|   |                                                                          | ANCESTRY Freeze Two AMR  | <100 | 6366 | NA    | 10240657 | 0.928 |
|   |                                                                          | ANCESTRY Freeze Two AFR  | <100 | 2896 | NA    | 16452305 | 0.981 |
| 6 | COVID19 positive hospitalized<br>vs<br>COVID19 positive not hospitalized | Meta-analysis            | 2175 | 9181 | 11356 | 21151462 | 0.905 |
|   |                                                                          | ANCESTRY Freeze Two EUR  | 522  | 6104 | 6626  | 9043524  | 1.006 |
|   |                                                                          | UKB 500K Genotyped EUR   | 1145 | 652  | 1797  | 11342868 | 1.067 |
|   |                                                                          | ANCESTRY Freeze Two AMR  | <100 | 1045 | NA    | 10150288 | 0.932 |
|   |                                                                          | GHS Freeze 145 EUR       | 165  | 689  | 854   | 10228898 | 0.842 |
|   |                                                                          | ANCESTRY Freeze Two AFR  | <100 | 509  | NA    | 15854994 | 0.903 |
|   |                                                                          | UPENN Freeze One HRC AFR | 67   | 99   | 166   | 12127522 | 0.702 |
|   |                                                                          | UKB 500K Genotyped AFR   | 74   | 41   | 115   | 12995273 | 0.388 |
|   |                                                                          | UKB 500K Genotyped SAS   | 49   | 42   | 91    | 8249617  | 0.246 |
| 7 | COVID19 positive severe<br>vs<br>COVID19 positive not hospitalized       | Meta-analysis            | 874  | 9139 | 10013 | 20726690 | 0.875 |
|   |                                                                          | ANCESTRY Freeze Two EUR  | 236  | 6104 | 6340  | 9042185  | 0.987 |
|   |                                                                          | UKB 500K Genotyped EUR   | 472  | 652  | 1124  | 11279899 | 1.013 |
|   |                                                                          | ANCESTRY Freeze Two AMR  | <100 | 1045 | NA    | 10146032 | 0.912 |
|   |                                                                          | GHS Freeze 145 EUR       | 36   | 689  | 725   | 10193407 | 0.749 |
|   |                                                                          | ANCESTRY Freeze Two AFR  | <100 | 509  | NA    | 15739864 | 0.793 |
|   |                                                                          | UPENN Freeze One HRC AFR | 27   | 99   | 126   | 11135122 | 0.750 |
|   |                                                                          | UKB 500K Genotyped AFR   | 32   | 41   | 73    | 11037601 | 0.499 |

**Supplementary Table 5. Eight variants associated with COVID-19 susceptibility in previous GWAS.**

| Locus index | Independent signal index | Reference                                                                                                                                 | First author     | Phenotype                             | rs ID       | hg38             | Nearest gene   | Effect allele | Locus    | Odds Ratio | LCI  | UCI  | P-value  | N cases | N controls | Top independent association in locus |
|-------------|--------------------------|-------------------------------------------------------------------------------------------------------------------------------------------|------------------|---------------------------------------|-------------|------------------|----------------|---------------|----------|------------|------|------|----------|---------|------------|--------------------------------------|
| 1           | 1                        | <a href="https://www.medrxiv.org/content/10.1101/2020.09.24.20200048v2">https://www.medrxiv.org/content/10.1101/2020.09.24.20200048v2</a> | Pairo-Castineira | covid19 severe vs negative or unknown | rs73064425  | 3:45859597:C:T   | <i>LZTF1</i>   | T             | 3p21.31  | 2.14       | 1.88 | 2.45 | 4.77E-30 | 1676    | 8380       | 1                                    |
| 1           | 2                        | <a href="https://www.medrxiv.org/content/10.1101/2020.09.04.20188318v1">https://www.medrxiv.org/content/10.1101/2020.09.04.20188318v1</a> | Shelton          | covid test positive vs negative       | rs2531743   | 3:45796808:G:A   | <i>SLC6A20</i> | G             | 3p21.31  | 0.917      | 0.89 | 0.94 | 7.60E-10 | 12972   | 101268     | 1                                    |
| 2           | 1                        | <a href="https://www.medrxiv.org/content/10.1101/2020.09.24.20200048v2">https://www.medrxiv.org/content/10.1101/2020.09.24.20200048v2</a> | Pairo-Castineira | covid19 severe vs negative or unknown | rs143334143 | 6:31153649:G:A   | <i>CCHCR1</i>  | A             | 6p21.33  | 1.85       | 1.61 | 2.13 | 8.82E-18 | 1676    | 8380       | 1                                    |
| 3           | 1                        | <a href="https://www.medrxiv.org/content/10.1101/2020.09.04.20188318v1">https://www.medrxiv.org/content/10.1101/2020.09.04.20188318v1</a> | Shelton          | covid test positive vs negative       | rs9411378   | 9:133270015:A:C  | <i>ABO</i>     | C             | 9q34.2   | 0.857      | 0.83 | 0.89 | 5.30E-20 | 12972   | 101268     | 1                                    |
| 4           | 1                        | <a href="https://www.medrxiv.org/content/10.1101/2020.09.24.20200048v2">https://www.medrxiv.org/content/10.1101/2020.09.24.20200048v2</a> | Pairo-Castineira | covid19 severe vs negative or unknown | rs10735079  | 12:112942203:G:A | <i>OAS3</i>    | A             | 12q24.13 | 1.29       | 1.18 | 1.42 | 1.65E-08 | 1676    | 8380       | 1                                    |
| 5           | 1                        | <a href="https://www.medrxiv.org/content/10.1101/2020.09.24.20200048v2">https://www.medrxiv.org/content/10.1101/2020.09.24.20200048v2</a> | Pairo-Castineira | covid19 severe vs negative or unknown | rs2109069   | 19:4719431:G:A   | <i>DPP9</i>    | A             | 19p13.3  | 1.36       | 1.25 | 1.48 | 3.98E-12 | 1676    | 8380       | 1                                    |
| 6           | 1                        | <a href="https://www.medrxiv.org/content/10.1101/2020.09.24.20200048v2">https://www.medrxiv.org/content/10.1101/2020.09.24.20200048v2</a> | Pairo-Castineira | covid19 severe vs negative or unknown | rs74956615  | 19:10317045:T:A  | <i>RAVER1</i>  | A             | 19p13.2  | 1.59       | 1.35 | 1.87 | 2.31E-08 | 1676    | 8380       | 1                                    |
| 7           | 1                        | <a href="https://www.medrxiv.org/content/10.1101/2020.09.24.20200048v2">https://www.medrxiv.org/content/10.1101/2020.09.24.20200048v2</a> | Pairo-Castineira | covid19 severe vs negative or unknown | rs2236757   | 21:33252612:A:G  | <i>JENAR2</i>  | A             | 21q22.1  | 1.28       | 1.17 | 1.41 | 5.00E-08 | 1676    | 8380       | 1                                    |

**Supplementary Table 6. Association between eight published risk variants for COVID-19 and five disease susceptibility phenotypes. P-values in red were significant after correcting for the 40 tests performed (P<0.00125).**

| Locus, nearest gene | rs ID       | hg38             | Phenotype                                                        | Effect allele | Odds Ratio [95% CI] | P-value  | N cases with 0/1/2 copies of the effect allele | N controls with 0/1/2 copies of the effect allele | Effect allele frequency | N cases | N controls | Heterozygote Odds Ratio [95% CI] | Homozygote Odds Ratio [95% CI] |
|---------------------|-------------|------------------|------------------------------------------------------------------|---------------|---------------------|----------|------------------------------------------------|---------------------------------------------------|-------------------------|---------|------------|----------------------------------|--------------------------------|
| 3p21.31<br>SLC6A20  | rs2531743   | 3:45796808:G:A   | COVID19 positive vs COVID19 negative                             | A             | 1.056[1.023,1.091]  | 8.99E-04 | 1829 551 14016                                 | 9694 26714 18483                                  | 0.583                   | 11356   | 54891      | 0.965[0.843,1.104]               | 1.016[0.883,1.169]             |
|                     |             |                  | COVID19 positive vs COVID19 negative or unknown                  | A             | 1.048[1.018,1.079]  | 1.66E-03 | 1829 551 14016                                 | 110087 316587 224373                              | 0.588                   | 11356   | 651047     | 0.961[0.846,1.09]                | 1.009[0.883,1.152]             |
|                     |             |                  | COVID19 positive not hospitalized vs COVID19 negative or unknown | A             | 1.042[1.009,1.077]  | 1.22E-02 | 1462 4495 3224                                 | 110087 316587 224373                              | 0.588                   | 9181    | 651047     | 0.935[0.764,1.145]               | 0.829[0.666,1.031]             |
|                     |             |                  | COVID19 positive hospitalized vs COVID19 negative or unknown     | A             | 1.058[0.993,1.127]  | 8.40E-02 | 367 1016 792                                   | 110087 316587 224373                              | 0.588                   | 2175    | 651047     | 0.977[0.831,1.149]               | 1.125[0.952,1.33]              |
|                     |             |                  | COVID19 positive severe vs COVID19 negative or unknown           | A             | 1.052[0.950,1.165]  | 3.32E-01 | 142 399 297                                    | 88701 256292 182685                               | 0.589                   | 838     | 527678     | 1.061[0.821,1.37]                | 1.197[0.918,1.561]             |
| 3p21.31<br>LZTF1    | rs73064425  | 3:45859597:C:T   | COVID19 positive hospitalized vs COVID19 negative or unknown     | T             | 1.423[1.280,1.583]  | 6.89E-11 | 1772 378 25                                    | 559483 87535 4029                                 | 0.074                   | 2175    | 651047     | 1.387[1.19,1.617]                | 1.324[0.629,2.788]             |
|                     |             |                  | COVID19 positive severe vs COVID19 negative or unknown           | T             | 1.604[1.357,1.896]  | 3.09E-08 | 674 155 9                                      | 458181 66932 2565                                 | 0.068                   | 838     | 527678     | 1.626[1.296,2.039]               | 1.416[0.454,4.414]             |
|                     |             |                  | COVID19 positive vs COVID19 negative or unknown                  | T             | 1.103[1.047,1.161]  | 2.35E-04 | 9647 1627 82                                   | 559483 87535 4029                                 | 0.074                   | 11356   | 651047     | 1.188[1.044,1.351]               | 1.173[0.629,2.188]             |
|                     |             |                  | COVID19 positive vs COVID19 negative                             | T             | 1.100[1.038,1.165]  | 1.28E-03 | 9647 1627 82                                   | 47091 7439 361                                    | 0.075                   | 11356   | 54891      | 1.194[1.041,1.37]                | 1.045[0.541,2.02]              |
|                     |             |                  | COVID19 positive not hospitalized vs COVID19 negative or unknown | T             | 1.025[0.966,1.088]  | 4.11E-01 | 7875 1249 57                                   | 559483 87535 4029                                 | 0.073                   | 9181    | 651047     | 0.862[0.678,1.096]               | 0.927[0.298,2.884]             |
| 6p21.33<br>CCHCR1   | rs143334143 | 6:31153649:G:A   | COVID19 positive severe vs COVID19 negative or unknown           | A             | 1.362[1.142,1.624]  | 5.82E-04 | 686 143 9                                      | 458542 66524 2612                                 | 0.068                   | 838     | 527678     | 1.28[1.001,1.636]                | 1.831[0.683,4.906]             |
|                     |             |                  | COVID19 positive hospitalized vs COVID19 negative or unknown     | A             | 1.180[1.053,1.323]  | 4.46E-03 | 1820 332 23                                    | 560452 86962 3633                                 | 0.072                   | 2175    | 651047     | 1.159[0.984,1.365]               | 1.49[0.742,2.92]               |
|                     |             |                  | COVID19 positive vs COVID19 negative or unknown                  | A             | 1.028[0.978,1.080]  | 2.81E-01 | 9463 1807 86                                   | 560452 86962 3633                                 | 0.073                   | 11356   | 651047     | 1.086[0.95,1.241]                | 1.058[0.549,2.039]             |
|                     |             |                  | COVID19 positive vs COVID19 negative                             | A             | 1.030[0.974,1.089]  | 2.94E-01 | 9463 1807 86                                   | 4642381 10 358                                    | 0.082                   | 11356   | 54891      | 1.082[0.938,1.247]               | 1.118[0.556,2.247]             |
|                     |             |                  | COVID19 positive not hospitalized vs COVID19 negative or unknown | A             | 0.998[0.945,1.055]  | 9.49E-01 | 7643 1475 63                                   | 560452 86962 3633                                 | 0.073                   | 9181    | 651047     | 0.96[0.761,1.211]                | 0.318[0.045,2.264]             |
| 9q34.2<br>ABO       | rs9411378   | 9:133270015:A:C  | COVID19 positive vs COVID19 negative or unknown                  | C             | 0.892[0.861,0.925]  | 5.68E-10 | 616 3980 5906                                  | 28672 192655 316843                               | 0.767                   | 10502   | 538170     | 0.818[0.675,0.992]               | 0.799[0.663,0.963]             |
|                     |             |                  | COVID19 positive not hospitalized vs COVID19 negative or unknown | C             | 0.891[0.855,0.927]  | 2.00E-08 | 485 3247 4760                                  | 28672 192655 316843                               | 0.767                   | 8492    | 538170     | 0.96[0.688,1.34]                 | 0.874[0.631,1.211]             |
|                     |             |                  | COVID19 positive vs COVID19 negative                             | C             | 0.914[0.878,0.952]  | 1.41E-05 | 616 3980 5906                                  | 2200 13988 22555                                  | 0.760                   | 10502   | 38743      | 0.87[0.709,1.068]                | 0.867[0.711,1.058]             |
|                     |             |                  | COVID19 positive hospitalized vs COVID19 negative or unknown     | C             | 0.898[0.831,0.972]  | 7.66E-03 | 131 733 1146                                   | 28672 192655 316843                               | 0.768                   | 2010    | 538170     | 0.75[0.592,0.949]                | 0.763[0.607,0.958]             |
|                     |             |                  | COVID19 positive severe vs COVID19 negative or unknown           | C             | 0.910[0.804,1.029]  | 1.33E-01 | 51 309 478                                     | 28405 189752 309521                               | 0.766                   | 838     | 527678     | 0.933[0.63,1.381]                | 0.889[0.606,1.303]             |
| 12q24.13<br>OAS3    | rs10735079  | 12:112942203:G:A | COVID19 positive vs COVID19 negative or unknown                  | A             | 1.027[0.997,1.057]  | 7.40E-02 | 1342 5061 4953                                 | 84999 298664 267384                               | 0.640                   | 11356   | 651047     | 1.145[0.989,1.326]               | 1.108[0.954,1.287]             |
|                     |             |                  | COVID19 positive hospitalized vs COVID19 negative or unknown     | A             | 1.049[0.985,1.118]  | 1.39E-01 | 252 967 956                                    | 84999 298664 267384                               | 0.640                   | 2175    | 651047     | 1.094[0.913,1.31]                | 1.038[0.863,1.248]             |
|                     |             |                  | COVID19 positive vs COVID19 negative                             | A             | 1.021[0.988,1.055]  | 2.11E-01 | 1342 5061 4953                                 | 7006 2501 322872                                  | 0.647                   | 11356   | 54891      | 1.13[0.968,1.32]                 | 1.118[0.954,1.309]             |
|                     |             |                  | COVID19 positive not hospitalized vs COVID19 negative or unknown | A             | 1.019[0.987,1.053]  | 2.50E-01 | 1090 4094 3997                                 | 84999 298664 267384                               | 0.640                   | 9181    | 651047     | 1.249[0.97,1.608]                | 1.248[0.966,1.613]             |
|                     |             |                  | COVID19 positive severe vs COVID19 negative or unknown           | A             | 1.001[0.904,1.109]  | 9.85E-01 | 103 379 356                                    | 69087 241997 216594                               | 0.640                   | 838     | 527678     | 1.163[0.875,1.546]               | 1.066[0.796,1.427]             |
| 19p13.3<br>DPP9     | rs2109069   | 19:4719431:G:A   | COVID19 positive vs COVID19 negative or unknown                  | A             | 1.061[1.030,1.094]  | 1.14E-04 | 5453 4796 1107                                 | 308052 278615 64380                               | 0.313                   | 11356   | 651047     | 1.103[1.003,1.214]               | 1.196[1.029,1.389]             |
|                     |             |                  | COVID19 positive hospitalized vs COVID19 negative or unknown     | A             | 1.126[1.056,1.202]  | 3.10E-04 | 1005 920 250                                   | 308052 278615 64380                               | 0.313                   | 2175    | 651047     | 1.147[1.017,1.293]               | 1.229[1.018,1.482]             |
|                     |             |                  | COVID19 positive vs COVID19 negative                             | A             | 1.050[1.016,1.086]  | 4.05E-03 | 5453 4796 1107                                 | 26492 23154 5245                                  | 0.307                   | 11356   | 54891      | 1.127[1.018,1.247]               | 1.189[1.013,1.394]             |
|                     |             |                  | COVID19 positive not hospitalized vs COVID19 negative or unknown | A             | 1.041[1.006,1.076]  | 2.12E-02 | 4448 3876 857                                  | 308052 278615 64380                               | 0.313                   | 9181    | 651047     | 1.032[0.88,1.209]                | 1.142[0.891,1.464]             |
|                     |             |                  | COVID19 positive severe vs COVID19 negative or unknown           | A             | 1.114[1.003,1.236]  | 4.35E-02 | 389 352 97                                     | 247274 226991 53413                               | 0.316                   | 838     | 527678     | 1.13[0.938,1.361]                | 1.21[0.903,1.621]              |
| 19p13.2<br>RAVER1   | rs74956615  | 19:10317045:T:A  | COVID19 positive hospitalized vs COVID19 negative or unknown     | A             | 1.146[0.996,1.319]  | 5.68E-02 | 1954 214 7                                     | 585478 63808 1761                                 | 0.052                   | 2175    | 651047     | 1.021[0.846,1.232]               | 1.196[0.447,3.199]             |
|                     |             |                  | COVID19 positive severe vs COVID19 negative or unknown           | A             | 1.241[0.992,1.553]  | 5.89E-02 | 748 87 3                                       | 474063 52156 1459                                 | 0.052                   | 838     | 527678     | 1.106[0.833,1.468]               | 1.463[0.364,5.875]             |
|                     |             |                  | COVID19 positive vs COVID19 negative or unknown                  | A             | 1.028[0.962,1.100]  | 4.11E-01 | 10333 994 29                                   | 585478 63808 1761                                 | 0.052                   | 11356   | 651047     | 0.988[0.848,1.149]               | 0.947[0.393,2.282]             |
|                     |             |                  | COVID19 positive vs COVID19 negative                             | A             | 1.031[0.958,1.110]  | 4.19E-01 | 10333 994 29                                   | 49647 5095 149                                    | 0.049                   | 11356   | 54891      | 0.999[0.851,1.173]               | 0.808[0.322,2.026]             |
|                     |             |                  | COVID19 positive not hospitalized vs COVID19 negative or unknown | A             | 1.000[0.927,1.078]  | 1.00E+00 | 8379 780 22                                    | 585478 63808 1761                                 | 0.052                   | 9181    | 651047     | 0.93[0.719,1.203]                | 0.517[0.073,3.676]             |
| 21q22.1<br>IFNAR2   | rs2236757   | 21:33252612:A:G  | COVID19 positive hospitalized vs COVID19 negative or unknown     | G             | 0.882[0.826,0.942]  | 1.90E-04 | 2209 1810 37                                   | 53504 264441 333102                               | 0.715                   | 2175    | 651047     | 0.984[0.794,1.22]                | 0.901[0.728,1.113]             |
|                     |             |                  | COVID19 positive vs COVID19 negative or unknown                  | G             | 0.947[0.919,0.976]  | 4.50E-04 | 1090 4751 5515                                 | 53504 264441 333102                               | 0.714                   | 11356   | 651047     | 1.006[0.846,1.196]               | 0.919[0.774,1.09]              |
|                     |             |                  | COVID19 positive severe vs COVID19 negative or unknown           | G             | 0.834[0.752,0.925]  | 6.33E-04 | 85 364 389                                     | 41990 212771 272917                               | 0.719                   | 838     | 527678     | 0.972[0.703,1.344]               | 0.799[0.578,1.103]             |
|                     |             |                  | COVID19 positive vs COVID19 negative                             | G             | 0.958[0.926,0.991]  | 1.22E-02 | 1090 4751 5515                                 | 4676 22547 27668                                  | 0.707                   | 11356   | 54891      | 1.014[0.845,1.218]               | 0.916[0.765,1.098]             |
|                     |             |                  | COVID19 positive not hospitalized vs COVID19 negative or unknown | G             | 0.965[0.932,0.998]  | 3.70E-02 | 870 3833 4478                                  | 53504 264441 333102                               | 0.714                   | 9181    | 651047     | 1.046[0.782,1.399]               | 0.952[0.714,1.27]              |

**Supplementary Table 7. Comparison of effect sizes between ancestries for the six published risk variants that were validated in this study.**

| rs ID       | hg38            | Effect allele | Phenotype                                                    | Ancestry | Odds Ratio | 95% LCI | 95% UCI | P-value  | N cases with 0 1 2 copies of the effect allele | N controls with 0 1 2 copies of the effect allele | Effect allele frequency |
|-------------|-----------------|---------------|--------------------------------------------------------------|----------|------------|---------|---------|----------|------------------------------------------------|---------------------------------------------------|-------------------------|
| rs2531743   | 3:45796808:G:A  | A             | COVID19 positive vs COVID19 negative                         | AFR      | 1.072      | 0.944   | 1.218   | 0.2828   | 190 455 213                                    | 598 1225 556                                      | 0.497                   |
|             |                 |               |                                                              | EUR      | 1.046      | 1.010   | 1.083   | 0.0113   | 1499 4525 3253                                 | 8764 24352 16929                                  | 0.584                   |
| rs73064425  | 3:45859597:C:T  | T             | COVID19 positive hospitalized vs COVID19 negative or unknown | AFR      | 0.707      | 0.292   | 1.712   | 0.4422   | 205 4 0                                        | 20400 538 1                                       | 0.013                   |
|             |                 |               |                                                              | AMR      | 1.041      | 0.541   | 2.002   | 0.9041   | <100                                           | 5717 629 <100                                     | 0.053                   |
|             |                 |               |                                                              | EUR      | 1.469      | 1.314   | 1.642   | 1.33E-11 | 1464 349 19                                    | 527473 82482 3295                                 | 0.073                   |
|             |                 |               |                                                              | SAS      | 1.159      | 0.730   | 1.839   | 0.5323   | 26 18 5                                        | 5868 3913 711                                     | 0.254                   |
|             |                 |               |                                                              | AFR      | 2.131      | 1.217   | 3.729   | 0.0081   | 76 19 0                                        | 18816 2056 67                                     | 0.053                   |
| rs143334143 | 6:31153649:G:A  | A             | COVID19 positive severe vs COVID19 negative or unknown       | AMR      | 1.075      | 0.485   | 2.382   | 0.8586   | <100                                           | 4985 1287 <100                                    | 0.116                   |
|             |                 |               |                                                              | EUR      | 1.310      | 1.083   | 1.584   | 0.0055   | 583 116 9                                      | 434741 63181 2451                                 | 0.068                   |
|             |                 |               |                                                              | AFR      | 0.840      | 0.719   | 0.982   | 0.0283   | 28 229 435                                     | 354 3442 8405                                     | 0.828                   |
| rs9411378   | 9:133270015:A:C | C             | COVID19 positive vs COVID19 negative or unknown              | AMR      | 0.868      | 0.761   | 0.991   | 0.0363   | <100 367 721                                   | 224 1954 4188                                     | 0.823                   |
|             |                 |               |                                                              | EUR      | 0.900      | 0.866   | 0.936   | 1.43E-07 | 534 3280 4609                                  | 27335 181077 291961                               | 0.764                   |
|             |                 |               |                                                              | SAS      | 0.982      | 0.635   | 1.520   | 0.9362   | 2 25 64                                        | 267 2903 7322                                     | 0.845                   |
|             |                 |               |                                                              | AFR      | 1.080      | 0.954   | 1.223   | 0.2228   | 509 293 56                                     | 12822 7078 1039                                   | 0.219                   |
| rs2109069   | 19:4719431:G:A  | A             | COVID19 positive vs COVID19 negative or unknown              | AMR      | 1.105      | 0.988   | 1.236   | 0.0811   | 610 440 <100                                   | 3517 2411 438                                     | 0.260                   |
|             |                 |               |                                                              | EUR      | 1.054      | 1.020   | 1.088   | 0.0015   | 4284 4028 965                                  | 285171 265656 62423                               | 0.318                   |
|             |                 |               |                                                              | SAS      | 1.366      | 0.949   | 1.964   | 0.0930   | 50 35 6                                        | 6537 3473 482                                     | 0.211                   |
|             |                 |               |                                                              | AFR      | 1.054      | 0.834   | 1.333   | 0.6596   | 13 66 130                                      | 1053 7215 12671                                   | 0.777                   |
| rs2236757   | 21:33252612:A:G | G             | COVID19 positive hospitalized vs COVID19 negative or unknown | AMR      | 0.618      | 0.462   | 0.827   | 0.0012   | <100                                           | 875 2951 2540                                     | 0.629                   |
|             |                 |               |                                                              | EUR      | 0.890      | 0.829   | 0.956   | 0.0014   | 174 788 870                                    | 49815 249137 314298                               | 0.716                   |
|             |                 |               |                                                              | SAS      | 0.723      | 0.482   | 1.085   | 0.1175   | 14 19 16                                       | 1753 4955 3784                                    | 0.596                   |
|             |                 |               |                                                              | AFR      | 1.054      | 0.834   | 1.333   | 0.6596   | 13 66 130                                      | 1053 7215 12671                                   | 0.777                   |



**Supplementary Table 8. Association between a COVID-19 severity score and seven variants (four known, three novel) associated with both disease risk and severity.**

| Locus    | Nearest gene   | rs ID       | Effect Allele | Novelty                                        | Association with COVID-19 severity continuous phenotype |       |          |
|----------|----------------|-------------|---------------|------------------------------------------------|---------------------------------------------------------|-------|----------|
|          |                |             |               |                                                | Beta (SD in severity score)                             | SE    | P-Value  |
| 3p21.31  | <i>LZTFL1</i>  | rs73064425  | T             | Validated and associated with disease severity | 0.19                                                    | 0.038 | 4.45E-07 |
| 5q34     | <i>CCNG1</i>   | rs79833209  | T             | Novel                                          | 0.18                                                    | 0.077 | 0.017    |
| 19p13.3  | <i>DPP9</i>    | rs2109069   | A             | Validated and associated with disease severity | 0.05                                                    | 0.022 | 0.028    |
| 21q22.1  | <i>IFNAR2</i>  | rs2236757   | A             | Validated and associated with disease severity | 0.05                                                    | 0.022 | 0.032    |
| 16q24.3  | <i>ACSF3</i>   | rs4782327   | G             | Novel                                          | 0.05                                                    | 0.025 | 0.033    |
| 19q13.41 | <i>FPR1</i>    | rs12461764  | G             | Novel                                          | 0.04                                                    | 0.021 | 0.055    |
| 6p21.33  | <i>CCHCR1</i>  | rs143334143 | A             | Validated and associated with disease severity | 0.04                                                    | 0.035 | 0.216    |
| 3p21.31  | <i>SLC6A20</i> | rs2531743   | A             | Validated                                      | 0.01                                                    | 0.022 | 0.551    |
| 9q34.2   | <i>ABO</i>     | rs9411378   | A             | Validated                                      | 0.01                                                    | 0.026 | 0.565    |

**Supplementary Table 9. Missense or predicted loss-of-function variants in high linkage disequilibrium (LD,  $r^2 > 0.95$ ) with sentinel GWAS variants.**

| Locus   | Sentinel GWAS variant |                 |               | Missense or pLOF in high LD with lead variant |            |                 |                               |                    |
|---------|-----------------------|-----------------|---------------|-----------------------------------------------|------------|-----------------|-------------------------------|--------------------|
|         | rs ID                 | hg38            | Nearest gene  | Gene                                          | rs ID      | hg38            | r2 with sentinel GWAS variant | Variant effect     |
| 21q22.1 | rs13050728            | 21:33242905:T:C | <i>IFNAR2</i> | <i>IFNAR2</i>                                 | rs1051393  | 21:33241950:T:G | 1.00                          | Missense:Phe10Val  |
|         |                       |                 |               |                                               | rs1131668  | 21:33262573:G:A | 0.97                          | Missense:Ala285Thr |
| 6p21.33 | rs143334143           | 6:31153649:G:A  | <i>CCHCR1</i> | <i>CCHCR1</i>                                 | rs130072   | 6:31144707:C:T  | 1.00                          | Missense:Arg716Gln |
|         |                       |                 |               |                                               | rs11540822 | 6:31151121:A:T  | 0.99                          | Missense:Leu268Gln |
|         |                       |                 |               |                                               | rs72856718 | 6:31157480:C:A  | 1.00                          | stop_gained:Glu41X |
|         |                       |                 |               | <i>TCF19</i>                                  | rs2073724  | 6:31161930:C:T  | 1.00                          | Missense:Pro241Leu |

**Supplementary Table 10. Published gene expression datasets used to identify sentinel expression quantitative trait loci (eQTL) that co-localized (LD  $r^2 > 0.95$ ) with sentinel GWAS variants.**

| First author   | PMID     | Tissue/cell type            | Sample size |
|----------------|----------|-----------------------------|-------------|
| Alasoo         | 29379200 | MACROPHAGES-IFNg            | 86          |
|                |          | MACROPHAGES-IFNg-salmonella | 86          |
|                |          | MACROPHAGES-naive           | 86          |
|                |          | MACROPHAGES-salmonella      | 86          |
| Andiappan      | 26259071 | NEUTROPHILS                 | 114         |
| Barreiro       | 22233810 | DENDRITIC-NotInfected       | 65          |
|                |          | DENDRITIC-TBInfected        | 65          |
| Battle         | 24092820 | WHOLE-BLOOD                 | 922         |
|                |          | WHOLE-BLOOD-ase             | 922         |
|                |          | WHOLE-BLOOD-splice          | 922         |
| Brown          | 29058714 | LCLS                        | 506         |
|                |          | SKIN                        | 471         |
|                |          | WHOLE-BLOOD                 | 242         |
| Brumpton       | 27155841 | LCLS                        | 356         |
| Caliskan       | 25874939 | PBMCS-baseline              | 98          |
|                |          | PBMCS-rhinovirus            | 98          |
|                |          | PBMCS-rhinovirus-rcQTL      | 98          |
| Chen           | 27863251 | CD4TCELLS                   | Up to 197   |
|                |          | MONOCYTES                   | Up to 197   |
|                |          | NEUTROPHILS                 | Up to 197   |
| Chiang         | 28369037 | LUNG                        | Up to 147   |
|                |          | SKIN                        | Up to 147   |
|                |          | WHOLEBLOOD                  | Up to 147   |
| Davenport 2016 | 26917434 | LEUCOCYTES                  | 265         |
| Davenport 2018 | 30340504 | WHOLEBLOOD                  | 157         |
|                |          | WHOLEBLOOD-IFN-interaction  | 157         |
| Dimas          | 19644074 | LCLS                        | 75          |
|                |          | TCELLS                      | 75          |
| Di Narzo       | 27336838 | WHOLE-BLOOD                 | 149         |
| Ding           | 21129726 | LESIONAL-SKIN               | 57          |
|                |          | NORMAL-SKIN                 | 53          |
|                |          | UNINVOLVED-SKIN             | 53          |
| Dixon          | 17873877 | LCLS                        | 400         |
| Fairfax 2012   | 22446964 | BCELLS                      | 283         |
|                |          | MONOCYTES                   | 283         |
| Fairfax 2014   | 24604202 | MONOCYTES-IFN               | 367         |
|                |          | MONOCYTES-LPS2              | 261         |
|                |          | MONOCYTES-LPS24             | 322         |
|                |          | MONOCYTES-NAIVE             | 414         |
| Fehrmann       | 21829388 | WHOLE-BLOOD                 | 1469        |
| Ferraro        | 24610777 | Tconv                       | 65          |
|                |          | Tregs                       | 65          |
| Franco         | 23878721 | WHOLE-BLOOD-Influenza       | 247         |
| Lappalainen    | 24037378 | LCLS                        | 373         |
| Grundberg      | 22941192 | LCLS                        | 856         |
|                |          | SKIN                        | 856         |
| GTEX v8        | 32912332 | 49 individual tissues       | 73-706      |
| Hao            | 23209423 | LUNG                        | 1111        |
| Huang          | 25951796 | LCLs                        | 368         |
|                |          | PBMCS                       | 240         |
|                |          | SKIN                        | 110         |
| Jansen         | 28165122 | WHOLE-BLOOD                 | 4896        |
| Joahnes        | 28122634 | WHOLE-BLOOD                 | 5257        |
| Kasela         | 28248954 | CD4TCELLS                   | 293         |
|                |          | CD8TCELLS                   | 293         |
| KimHellmuth    | 28814792 | MONOCYTES-LPS6H             | 134         |
|                |          | MONOCYTES-LPS90             | 134         |
|                |          | MONOCYTES-MDP6H             | 134         |
|                |          | MONOCYTES-MDP90             | 134         |
|                |          | MONOCYTES-RNA6H             | 134         |

|                              |          |                               |         |
|------------------------------|----------|-------------------------------|---------|
| Kim                          | 25327457 | MONOCYTES-Baseline            | 137     |
|                              |          | MONOCYTES-Differential        | 137     |
|                              |          | MONOCYTES-LPS                 | 137     |
| Kukurba                      | 27197214 | WHOLE-BLOOD                   | 922     |
| Lee                          | 24604203 | DENDRITIC-Baseline            | 528     |
|                              |          | DENDRITIC-Flu                 | 342     |
|                              |          | DENDRITIC-Flu-delta           | 342     |
|                              |          | DENDRITIC-IFNb                | 284     |
|                              |          | DENDRITIC-IFNb-delta          | 284     |
|                              |          | DENDRITIC-LPS                 | 356     |
|                              |          | DENDRITIC-LPS-delta           | 356     |
| LloydJones                   | 28065468 | WHOLE-BLOOD                   | 2765    |
| Luo                          | 26102239 | SMALL-AIRWAYS                 | 105     |
| Momozawa                     | 29930244 | BCELLS                        | 323     |
|                              |          | CD4TCELLS                     | 323     |
|                              |          | CD8TCELLS                     | 323     |
|                              |          | GRANULOCYTES                  | 323     |
|                              |          | MONOCYTES                     | 323     |
| Murphy                       | 20833654 | CD4-TCELLS                    | 200     |
| Naranbhai                    | 26151758 | NEUTROPHILS                   | 101     |
| Nedelec                      | 27768889 | MACROPHAGES-baseline          | 95      |
|                              |          | MACROPHAGES-baseline-asQTL    | 95      |
|                              |          | MACROPHAGES-listeria          | 95      |
|                              |          | MACROPHAGES-listeria-asQTL    | 95      |
|                              |          | MACROPHAGES-listeria-reQTL    | 95      |
|                              |          | MACROPHAGES-salmonella        | 95      |
|                              |          | MACROPHAGES-salmonella-asQTL  | 95      |
| MACROPHAGES-salmonella-reQTL | 95       |                               |         |
| Pala                         | 28394350 | LEUCOCYTES                    | 624     |
| Peters                       | 27015630 | BCELLS                        | 80      |
|                              |          | CD4-TCELLS                    | 121     |
|                              |          | CD8-TCELLS                    | 108     |
|                              |          | MONOCYTES                     | 124     |
|                              |          | NEUTROPHILS                   | 121     |
| Qiu 2011                     | 21949713 | SPUTUM                        | 131     |
| Qiu 2014                     | 24770851 | LCLS-steroids                 | 117     |
| Quach                        | 27768888 | MONOCYTES-baseline            | 100     |
|                              |          | MONOCYTES-IAV                 | 100     |
|                              |          | MONOCYTES-LPS                 | 100     |
|                              |          | MONOCYTES-Pam3CSK4            | 100     |
|                              |          | MONOCYTES-R848                | 100     |
| Raj                          | 24786080 | CD4-TCELLS                    | 407     |
|                              |          | MONOCYTES                     | 401     |
| vanderWijst                  | 29610479 | BCELLS                        | 45      |
|                              |          | CD4TCELLS                     | 45      |
|                              |          | CD8TCELLS                     | 45      |
|                              |          | DENDRITIC                     | 45      |
|                              |          | MONOCYTES                     | 45      |
|                              |          | MONOCYTES-classical           | 45      |
|                              |          | MONOCYTES-nonclassical        | 45      |
|                              |          | NKCELLS                       | 45      |
|                              |          | PBMCS                         | 45      |
|                              |          | Vosa                          | BioRxiv |
| Walsh                        | 27140173 | WHOLE-BLOOD                   | 377     |
| Westra                       | 24013639 | WHOLE-BLOOD                   | 5311    |
| Yao                          | 28285768 | WHOLEBLOOD                    | 5257    |
| Ye                           | 25214635 | CD4-TCELLS-48h328             | 348     |
|                              |          | CD4-TCELLS-48hTh17            | 348     |
|                              |          | CD4-TCELLS-4h328              | 348     |
|                              |          | CD4-TCELLS-4hIFNb             | 348     |
|                              |          | CD4-TCELLS-UNST               | 348     |
| Zeller                       | 20502693 | MONOCYTES                     | 1490    |
| Zhemakova                    | 27918533 | WHOLEBLOOD-exon-primary       | 2116    |
|                              |          | WHOLEBLOOD-exonratio-primary  | 2116    |
|                              |          | WHOLEBLOOD-gene-primary       | 2116    |
|                              |          | WHOLEBLOOD-polyAratio-primary | 2116    |

**Supplementary Table 11. Expression quantitative trait loci (eQTL) that co-localized (LD  $r^2 > 0.95$ ) with sentinel GWAS variants.**

| Sentinel GWAS variant |             |                 |                             | Sentinel eQTL |                 |                |                                    |                 |               |                        |          |                               |                                                  |        |       |   |
|-----------------------|-------------|-----------------|-----------------------------|---------------|-----------------|----------------|------------------------------------|-----------------|---------------|------------------------|----------|-------------------------------|--------------------------------------------------|--------|-------|---|
| Locus                 | rs ID       | hg38            | Disease predisposing allele | rs ID         | hg38            | Gene           | eQTL dataset                       | P-value         | Effect allele | Reference allele       | Effect   | r2 with sentinel GWAS variant | Allele in phase with disease predisposing allele |        |       |   |
| 3p21.31               | rs73064425  | 3:45859597:C:T  | T                           | rs17763537    | 3:45801823:C:T  | <i>SLC6A20</i> | Hao Lung                           | 1.00E-16        | C             | T                      | -9.320   | 0.961                         | T                                                |        |       |   |
| 21q22.1               | rs13050728  | 21:33242905:T:C | T                           | rs12482556    | 21:33230629:T:C | <i>IFNAR2</i>  | Momozawa CD4Tcells                 | 1.54E-16        | C             | T                      | -0.147   | 0.969                         | C                                                |        |       |   |
|                       |             |                 |                             | rs2834158     | 21:33244908:T:C | <i>IFNAR2</i>  | Fairfax Monocytes IFN              | 2.22E-13        | NA            | NA                     | NA       | 0.969                         | T                                                |        |       |   |
|                       |             |                 |                             | rs17860115    | 21:33230000:C:A | <i>IFNAR2</i>  | Fairfax Monocytes naive            | 1.84E-20        | NA            | NA                     | NA       | 0.960                         | A                                                |        |       |   |
|                       |             |                 |                             |               |                 |                | Huang PBMCs                        | 5.92E-20        | C             | A                      | 0.678    | 0.960                         | A                                                |        |       |   |
|                       |             |                 |                             |               |                 |                | Hao Lung                           | 1.00E-16        | C             | A                      | 11.000   | 0.960                         | A                                                |        |       |   |
|                       |             |                 |                             |               |                 |                | Momozawa Monocytes                 | 4.09E-11        | A             | C                      | -0.118   | 0.960                         | A                                                |        |       |   |
|                       |             |                 |                             |               |                 |                | rs2834163                          | 21:33248146:G:A | <i>IFNAR2</i> | GTeXv8 Muscle Skeletal | 1.01E-15 | A                             | G                                                | -0.239 | 0.951 | G |
| 6p21.33               | rs143334143 | 6:31153649:G:A  | A                           | rs130072      | 6:31144707:C:T  | <i>TCF19</i>   | Yao Whole Blood                    | 2.14E-96        | C             | T                      | -0.092   | 1.000                         | T                                                |        |       |   |
|                       |             |                 |                             | rs112279190   | 6:31155370:C:T  | <i>TCF19</i>   | GTeXv8 Artery Aorta                | 2.14E-22        | T             | C                      | 1.019    | 1.000                         | T                                                |        |       |   |
|                       |             |                 |                             | rs17197087    | 6:31158455:C:T  | <i>TCF19</i>   | GTeXv8 Brain Hypothalamus          | 8.32E-17        | T             | C                      | 1.383    | 0.962                         | T                                                |        |       |   |
|                       |             |                 |                             | rs17197087    | 6:31158455:C:T  | <i>TCF19</i>   | GTeXv8 Muscle Skeletal             | 6.93E-14        | T             | C                      | 0.474    | 0.962                         | T                                                |        |       |   |
|                       |             |                 |                             |               |                 |                | GTeXv8 Brain Frontal Cortex BA9    | 6.53E-10        | T             | C                      | 0.961    | 0.962                         | T                                                |        |       |   |
|                       |             |                 |                             |               |                 |                | Zhemakova Whole Blood gene         | 4.90E-156       | T             | C                      | 26.612   | 0.962                         | T                                                |        |       |   |
|                       |             |                 |                             |               |                 |                | GTeXv8 Brain Caudate basal ganglia | 4.73E-10        | T             | C                      | 1.020    | 0.962                         | T                                                |        |       |   |
|                       |             |                 |                             |               |                 |                | GTeXv8 Pituitary                   | 4.58E-22        | T             | C                      | 1.108    | 0.962                         | T                                                |        |       |   |
|                       |             |                 |                             |               |                 |                | Ratnapryia Retina                  | 4.25E-30        | T             | C                      | 1.371    | 0.962                         | T                                                |        |       |   |
|                       |             |                 |                             |               |                 |                | GTeXv8 Brain Cortex                | 3.28E-22        | T             | C                      | 1.142    | 0.962                         | T                                                |        |       |   |
|                       |             |                 |                             |               |                 |                | GTeXv8 Brain Cerebellar Hemisphere | 1.95E-17        | T             | C                      | 1.215    | 0.962                         | T                                                |        |       |   |
|                       |             |                 |                             |               |                 |                | Joehanes Whole Blood               | 1.61E-98        | C             | T                      | -0.091   | 0.962                         | T                                                |        |       |   |
|                       |             |                 |                             |               |                 |                | Chen CD4Tcells                     | 1.35E-18        | T             | C                      | 1.820    | 0.962                         | T                                                |        |       |   |
|                       |             |                 |                             |               |                 |                | GTeXv8 Brain Amygdala              | 1.14E-09        | T             | C                      | 1.241    | 0.962                         | T                                                |        |       |   |
|                       |             |                 |                             |               |                 |                | rs17197101                         | 6:31158632:G:T  | <i>TCF19</i>  | Davenport Whole Blood  | 1.50E-36 | T                             | G                                                | 0.438  | 0.962 | T |
|                       |             |                 |                             | rs114881571   | 6:31160828:C:T  | <i>TCF19</i>   | Walsh Whole Blood                  | 2.54E-15        | NA            | NA                     | NA       | 0.962                         | T                                                |        |       |   |
|                       |             |                 |                             |               |                 |                | Pala Leucocytes                    | 2.95E-49        | G             | T                      | -1.648   | 0.962                         | T                                                |        |       |   |
|                       |             |                 |                             |               |                 |                | Battle Whole Blood                 | 3.43E-99        | NA            | NA                     | NA       | 0.962                         | T                                                |        |       |   |
|                       |             |                 |                             |               |                 |                | rs72863830                         | 6:31221764:G:A  | <i>TCF19</i>  | Jansen Whole Blood     | 1.20E-35 | T                             | C                                                | 0.416  | 1.000 | T |
|                       |             |                 |                             |               |                 |                | GTeXv8 Whole Blood                 | 9.62E-19        | A             | G                      | 0.324    | 0.960                         | A                                                |        |       |   |

**Supplementary Table 12. Association between a four-SNP genetic risk score (GRS) and risk of hospitalization among COVID-19 cases**

| Population, total N<br>COVID-19 cases                          | GRS Group                     | Risk of hospitalization among COVID-19 cases<br>(N positive and hospitalized / N positive) x 100 |                    | Unadjusted<br>Risk<br>Difference | Adjusted Odds Ratio*                                        |       |       |       |          |
|----------------------------------------------------------------|-------------------------------|--------------------------------------------------------------------------------------------------|--------------------|----------------------------------|-------------------------------------------------------------|-------|-------|-------|----------|
|                                                                |                               | Highest GRS group                                                                                | Rest of Population |                                  | Estimate                                                    | SE    | LCI   | UCI   | P-value  |
|                                                                |                               |                                                                                                  |                    |                                  |                                                             |       |       |       |          |
| <b>European (EUR) ancestry</b>                                 |                               |                                                                                                  |                    |                                  |                                                             |       |       |       |          |
| AncestryDNA EUR<br>N=6,626                                     | Top 40% vs Rest of population | 10.3                                                                                             | 6.28               | 4.02                             | 1.65                                                        | 0.096 | 1.37  | 1.99  | 1.5E-07  |
|                                                                | Top 30% vs Rest of population | 10.84                                                                                            | 6.71               | 4.13                             | 1.65                                                        | 0.099 | 1.35  | 2     | 4.9E-07  |
|                                                                | Top 20% vs Rest of population | 11.9                                                                                             | 6.88               | 5.03                             | 1.77                                                        | 0.106 | 1.44  | 2.18  | 6.9E-08  |
|                                                                | Top 10% vs Rest of population | 13.81                                                                                            | 7.25               | 6.57                             | 1.96                                                        | 0.133 | 1.5   | 2.53  | 4.5E-07  |
|                                                                | Top 5% vs Rest of population  | 15.99                                                                                            | 7.47               | 8.52                             | 2.27                                                        | 0.172 | 1.61  | 3.16  | 1.7E-06  |
| GHS EUR<br>N=854                                               | Top 40% vs Rest of population | 18.42 (63/342)                                                                                   | 19.92 (102/512)    | -1.5                             | 1.37                                                        | 0.238 | 0.86  | 2.19  | 0.186    |
|                                                                | Top 30% vs Rest of population | 21.48 (55/256)                                                                                   | 18.39 (110/598)    | 3.09                             | 1.87                                                        | 0.250 | 1.14  | 3.05  | 0.013    |
|                                                                | Top 20% vs Rest of population | 22.22 (38/171)                                                                                   | 18.59 (127/683)    | 3.63                             | 1.72                                                        | 0.283 | 0.98  | 2.98  | 0.056    |
|                                                                | Top 10% vs Rest of population | 25.58 (22/86)                                                                                    | 18.62 (143/768)    | 6.96                             | 1.95                                                        | 0.357 | 0.96  | 3.9   | 0.061    |
|                                                                | Top 5% vs Rest of population  | 20.93 (9/43)                                                                                     | 19.24 (156/811)    | 1.69                             | 1.72                                                        | 0.496 | 0.62  | 4.42  | 0.273    |
| UKB EUR<br>N=1,797                                             | Top 40% vs Rest of population | 67.10 (469/699)                                                                                  | 61.57 (676/1098)   | 5.53                             | 1.31                                                        | 0.124 | 1.03  | 1.67  | 0.03     |
|                                                                | Top 30% vs Rest of population | 69.26 (356/514)                                                                                  | 61.50 (789/1283)   | 7.76                             | 1.63                                                        | 0.138 | 1.25  | 2.15  | 3.8E-04  |
|                                                                | Top 20% vs Rest of population | 73.09 (239/327)                                                                                  | 61.63 (906/1470)   | 11.46                            | 1.95                                                        | 0.166 | 1.41  | 2.71  | 6.0E-05  |
|                                                                | Top 10% vs Rest of population | 74.72 (133/178)                                                                                  | 62.51 (1012/1619)  | 12.21                            | 2.41                                                        | 0.221 | 1.57  | 3.75  | 7.0E-05  |
|                                                                | Top 5% vs Rest of population  | 75.56 (68/90)                                                                                    | 63.09 (1077/1707)  | 12.46                            | 2.29                                                        | 0.301 | 1.29  | 4.22  | 6.0E-03  |
| Meta-analysis EUR<br>N=9,277                                   | Top 40% vs Rest of population | NA                                                                                               |                    |                                  | 1.502                                                       | 0.072 | 1.304 | 1.731 | 1.80E-08 |
|                                                                | Top 30% vs Rest of population |                                                                                                  |                    |                                  | 1.662                                                       | 0.077 | 1.430 | 1.931 | 3.42E-11 |
|                                                                | Top 20% vs Rest of population |                                                                                                  |                    |                                  | 1.813                                                       | 0.085 | 1.534 | 2.144 | 3.19E-12 |
|                                                                | Top 10% vs Rest of population |                                                                                                  |                    |                                  | 2.060                                                       | 0.109 | 1.664 | 2.549 | 3.02E-11 |
|                                                                | Top 5% vs Rest of population  |                                                                                                  |                    |                                  | 2.226                                                       | 0.143 | 1.683 | 2.945 | 2.09E-08 |
| <b>African (AFR) ancestry</b>                                  |                               |                                                                                                  |                    |                                  |                                                             |       |       |       |          |
| AncestryDNA AFR<br>N<1,000                                     | Top 40% vs Rest of population | 11.36                                                                                            | 12.04              | -0.68                            | Number of hospitalized cases too small for analysis (N<100) |       |       |       |          |
|                                                                | Top 30% vs Rest of population | 12.14                                                                                            | 11.63              | 0.51                             |                                                             |       |       |       |          |
|                                                                | Top 20% vs Rest of population | 12.07                                                                                            | 11.71              | 0.36                             |                                                             |       |       |       |          |
|                                                                | Top 10% vs Rest of population | 6.00                                                                                             | 12.33              | -6.33                            |                                                             |       |       |       |          |
|                                                                | Top 5% vs Rest of population  | 7.14                                                                                             | 12.02              | -4.88                            |                                                             |       |       |       |          |
| UKB AFR<br>N=115                                               | Top 40% vs Rest of population | 55.26 (21/38)                                                                                    | 68.83 (53/77)      | -13.57                           | Number of hospitalized cases too small for analysis (N=74)  |       |       |       |          |
|                                                                | Top 30% vs Rest of population | 54.29 (19/35)                                                                                    | 68.75 (55/80)      | -14.46                           |                                                             |       |       |       |          |
|                                                                | Top 20% vs Rest of population | 59.09 (13/22)                                                                                    | 65.59 (61/93)      | -6.5                             |                                                             |       |       |       |          |
|                                                                | Top 10% vs Rest of population | 83.33 (10/12)                                                                                    | 62.14 (64/103)     | 21.2                             |                                                             |       |       |       |          |
|                                                                | Top 5% vs Rest of population  | 100.00 (5/5)                                                                                     | 62.73 (69/110)     | 37.27                            |                                                             |       |       |       |          |
| PMBB AFR<br>N=166                                              | Top 40% vs Rest of population | 43.94 (29/66)                                                                                    | 38.00 (38/100)     | 5.94                             | Number of hospitalized cases too small for analysis (N=67)  |       |       |       |          |
|                                                                | Top 30% vs Rest of population | 42.86 (21/49)                                                                                    | 39.32 (46/117)     | 3.54                             |                                                             |       |       |       |          |
|                                                                | Top 20% vs Rest of population | 42.42 (14/33)                                                                                    | 39.85 (53/133)     | 2.57                             |                                                             |       |       |       |          |
|                                                                | Top 10% vs Rest of population | 41.18 (7/17)                                                                                     | 40.27 (60/149)     | 0.91                             |                                                             |       |       |       |          |
|                                                                | Top 5% vs Rest of population  | 44.44 (4/9)                                                                                      | 40.13 (63/157)     | 4.32                             |                                                             |       |       |       |          |
| <b>Admixed American (AMR) and South Asian (SAS) ancestries</b> |                               |                                                                                                  |                    |                                  |                                                             |       |       |       |          |
|                                                                | Top 40% vs Rest of population | 7.73                                                                                             | 7.39               | 0.34                             |                                                             |       |       |       |          |

|                                                                                                                                                                                                                                                                      |                               |               |               |       |                                                             |
|----------------------------------------------------------------------------------------------------------------------------------------------------------------------------------------------------------------------------------------------------------------------|-------------------------------|---------------|---------------|-------|-------------------------------------------------------------|
| AncestryDNA AMR<br>N~1,000                                                                                                                                                                                                                                           | Top 30% vs Rest of population | 9.14          | 6.83          | 2.32  | Number of hospitalized cases too small for analysis (N<100) |
|                                                                                                                                                                                                                                                                      | Top 20% vs Rest of population | 11.06         | 6.64          | 4.42  |                                                             |
|                                                                                                                                                                                                                                                                      | Top 10% vs Rest of population | 11.5          | 7.08          | 4.42  |                                                             |
|                                                                                                                                                                                                                                                                      | Top 5% vs Rest of population  | 9.43          | 7.43          | 2.01  |                                                             |
| UKB SAS<br>N=91                                                                                                                                                                                                                                                      | Top 40% vs Rest of population | 61.11 (22/36) | 49.09 (27/55) | 12.02 | Number of hospitalized cases too small for analysis (N=49)  |
|                                                                                                                                                                                                                                                                      | Top 30% vs Rest of population | 60.00 (15/25) | 51.52 (34/66) | 8.48  |                                                             |
|                                                                                                                                                                                                                                                                      | Top 20% vs Rest of population | 61.11 (11/18) | 52.05 (38/73) | 9.06  |                                                             |
|                                                                                                                                                                                                                                                                      | Top 10% vs Rest of population | 77.78 (7/9)   | 51.22 (42/82) | 26.56 |                                                             |
|                                                                                                                                                                                                                                                                      | Top 5% vs Rest of population  | 75.00 (3/4)   | 52.87 (46/87) | 22.13 |                                                             |
| * Logistic regression model adjusted for age, sex, ancestry-informative PCs, REGENIE genome-wide predictor (to account for family structure) and clinical risk factors individually associated with risk of hospitalization in each study (see Methods for details). |                               |               |               |       |                                                             |

**Supplementary Table 13. Association between a four-SNP genetic risk score (GRS) and risk of severe disease among COVID-19 cases**

| Population, total N COVID-19 cases                             | GRS Group                     | Risk of severe disease among COVID-19 cases (N positive and severe / N positive) x 100 |                    | Unadjusted Risk Difference | Adjusted Odds Ratio*                                  |       |      |      |          |
|----------------------------------------------------------------|-------------------------------|----------------------------------------------------------------------------------------|--------------------|----------------------------|-------------------------------------------------------|-------|------|------|----------|
|                                                                |                               | Highest GRS group                                                                      | Rest of Population |                            | Estimate                                              | SE    | LCI  | UCI  | P-value  |
| <b>European (EUR) ancestry</b>                                 |                               |                                                                                        |                    |                            |                                                       |       |      |      |          |
| AncestryDNA EUR<br>N=6,626                                     | Top 40% vs Rest of population | 4.92                                                                                   | 2.66               | 2.26                       | 1.96                                                  | 0.141 | 1.49 | 2.59 | 1.60E-06 |
|                                                                | Top 30% vs Rest of population | 5.45                                                                                   | 2.82               | 2.63                       | 1.96                                                  | 0.142 | 1.48 | 2.59 | 2.40E-06 |
|                                                                | Top 20% vs Rest of population | 5.99                                                                                   | 2.96               | 3.03                       | 2.00                                                  | 0.151 | 1.49 | 2.69 | 4.50E-06 |
|                                                                | Top 10% vs Rest of population | 6.12                                                                                   | 3.29               | 2.83                       | 1.78                                                  | 0.195 | 1.21 | 2.61 | 3.20E-03 |
|                                                                | Top 5% vs Rest of population  | 7.84                                                                                   | 3.35               | 4.49                       | 2.34                                                  | 0.244 | 1.45 | 3.78 | 4.90E-04 |
| GHS EUR<br>N=854                                               | Top 40% vs Rest of population | 4.09 (14/342)                                                                          | 4.30 (22/512)      | -0.20                      | Number of severe cases too small for analysis (N=36)  |       |      |      |          |
|                                                                | Top 30% vs Rest of population | 4.30 (11/256)                                                                          | 4.18 (25/598)      | 0.12                       |                                                       |       |      |      |          |
|                                                                | Top 20% vs Rest of population | 4.09 (7/171)                                                                           | 4.25 (29/683)      | -0.15                      |                                                       |       |      |      |          |
|                                                                | Top 10% vs Rest of population | 4.65 (4/86)                                                                            | 4.17 (32/768)      | 0.48                       |                                                       |       |      |      |          |
|                                                                | Top 5% vs Rest of population  | 4.65 (2/43)                                                                            | 4.19 (34/811)      | 0.46                       |                                                       |       |      |      |          |
| UKB EUR<br>N=1,797                                             | Top 40% vs Rest of population | 30.33 (212/699)                                                                        | 23.68 (260/1098)   | 6.65                       | 1.28                                                  | 0.126 | 1.00 | 1.64 | 5.0E-02  |
|                                                                | Top 30% vs Rest of population | 31.71 (163/514)                                                                        | 24.08 (309/1283)   | 7.63                       | 1.35                                                  | 0.134 | 1.04 | 1.75 | 2.6E-02  |
|                                                                | Top 20% vs Rest of population | 32.42 (106/327)                                                                        | 24.90 (366/1470)   | 7.52                       | 1.46                                                  | 0.155 | 1.08 | 1.97 | 1.5E-02  |
|                                                                | Top 10% vs Rest of population | 34.83 (62/178)                                                                         | 25.32 (410/1619)   | 9.51                       | 1.94                                                  | 0.199 | 1.32 | 2.87 | 8.4E-04  |
|                                                                | Top 5% vs Rest of population  | 38.89 (35/90)                                                                          | 25.60 (437/1707)   | 13.29                      | 2.46                                                  | 0.272 | 1.44 | 4.19 | 9.3E-04  |
| Meta-analysis EUR<br>N=9,277                                   | Top 40% vs Rest of population | NA                                                                                     |                    |                            | 1.53                                                  | 0.093 | 1.28 | 1.84 | 4.2E-06  |
|                                                                | Top 30% vs Rest of population |                                                                                        |                    |                            | 1.59                                                  | 0.097 | 1.32 | 1.93 | 1.6E-06  |
|                                                                | Top 20% vs Rest of population |                                                                                        |                    |                            | 1.70                                                  | 0.108 | 1.37 | 2.09 | 9.5E-07  |
|                                                                | Top 10% vs Rest of population |                                                                                        |                    |                            | 1.84                                                  | 0.139 | 1.40 | 2.41 | 1.1E-05  |
|                                                                | Top 5% vs Rest of population  |                                                                                        |                    |                            | 2.36                                                  | 0.181 | 1.65 | 3.36 | 2.1E-06  |
| <b>African (AFR) ancestry</b>                                  |                               |                                                                                        |                    |                            |                                                       |       |      |      |          |
| AncestryDNA AFR<br>N<1,000                                     | Top 40% vs Rest of population | 5.91                                                                                   | 6.44               | -0.53                      | Number of severe cases too small for analysis (N<100) |       |      |      |          |
|                                                                | Top 30% vs Rest of population | 6.94                                                                                   | 5.94               | 1.00                       |                                                       |       |      |      |          |
|                                                                | Top 20% vs Rest of population | 7.76                                                                                   | 5.86               | 1.90                       |                                                       |       |      |      |          |
|                                                                | Top 10% vs Rest of population | 2.00                                                                                   | 6.64               | -4.64                      |                                                       |       |      |      |          |
|                                                                | Top 5% vs Rest of population  | 0.00                                                                                   | 6.56               | -6.56                      |                                                       |       |      |      |          |
| UKB AFR<br>N=115                                               | Top 40% vs Rest of population | 23.68 (9/38)                                                                           | 29.87 (23/77)      | -6.19                      | Number of severe cases too small for analysis (N=32)  |       |      |      |          |
|                                                                | Top 30% vs Rest of population | 25.71 (9/35)                                                                           | 28.75 (23/80)      | -3.04                      |                                                       |       |      |      |          |
|                                                                | Top 20% vs Rest of population | 27.27 (6/22)                                                                           | 27.96 (26/93)      | -0.68                      |                                                       |       |      |      |          |
|                                                                | Top 10% vs Rest of population | 50.00 (6/12)                                                                           | 25.24 (26/103)     | 24.76                      |                                                       |       |      |      |          |
|                                                                | Top 5% vs Rest of population  | 60.00 (3/5)                                                                            | 26.36 (29/110)     | 33.64                      |                                                       |       |      |      |          |
| PMBB AFR<br>N=166                                              | Top 40% vs Rest of population | 16.67 (11/66)                                                                          | 16.00 (16/100)     | 0.67                       | Number of severe cases too small for analysis (N=27)  |       |      |      |          |
|                                                                | Top 30% vs Rest of population | 14.29 (7/49)                                                                           | 17.09 (20/117)     | -2.81                      |                                                       |       |      |      |          |
|                                                                | Top 20% vs Rest of population | 21.21 (7/33)                                                                           | 15.04 (20/133)     | 6.17                       |                                                       |       |      |      |          |
|                                                                | Top 10% vs Rest of population | 29.41 (5/17)                                                                           | 14.77 (22/149)     | 14.65                      |                                                       |       |      |      |          |
|                                                                | Top 5% vs Rest of population  | 44.44 (4/9)                                                                            | 14.65 (23/157)     | 29.79                      |                                                       |       |      |      |          |
| <b>Admixed American (AMR) and South Asian (SAS) ancestries</b> |                               |                                                                                        |                    |                            |                                                       |       |      |      |          |
|                                                                | Top 40% vs Rest of population | 2.5                                                                                    | 3.48               | -0.98                      |                                                       |       |      |      |          |



|                            |                               |              |               |       |                                                       |
|----------------------------|-------------------------------|--------------|---------------|-------|-------------------------------------------------------|
| AncestryDNA AMR<br>N~1,000 | Top 30% vs Rest of population | 3.24         | 3.03          | 0.21  | Number of severe cases too small for analysis (N<100) |
|                            | Top 20% vs Rest of population | 3.98         | 2.88          | 1.11  |                                                       |
|                            | Top 10% vs Rest of population | 6.19         | 2.75          | 3.44  |                                                       |
|                            | Top 5% vs Rest of population  | 5.66         | 2.97          | 2.69  |                                                       |
| UKB SAS<br>N=91            | Top 40% vs Rest of population | 22.22 (8/36) | 12.73 (7/55)  | 9.49  | Number of severe cases too small for analysis (N=15)  |
|                            | Top 30% vs Rest of population | 28.00 (7/25) | 12.12 (8/66)  | 15.88 |                                                       |
|                            | Top 20% vs Rest of population | 38.89 (7/18) | 10.96 (8/73)  | 27.93 |                                                       |
|                            | Top 10% vs Rest of population | 44.44 (4/9)  | 13.41 (11/82) | 31.03 |                                                       |
|                            | Top 5% vs Rest of population  | 50.00 (2/4)  | 14.94 (13/87) | 35.06 |                                                       |

\* Logistic regression model adjusted for age, sex, ancestry-informative PCs, REGENIE genome-wide predictor (to account for family structure) and clinical risk factors individually associated with risk of severe disease in each study (see Methods for details).

**Supplementary Table 14. Association between a four-SNP genetic risk score (GRS) and risk of hospitalization and severe disease in individuals of European ancestry, after stratifying COVID-19 cases by the number of pre-existing clinical risk factors for severe COVID-19.**

| Population, total N COVID-19 cases | Number of established risk factors* | N COVID-19 cases | Risk among COVID-19 cases<br>(N positive and [hospitalized or severe] / N positive) x 100 |                    | Unadjusted Risk Difference | Adjusted Odds Ratio** |       |       |        |         |
|------------------------------------|-------------------------------------|------------------|-------------------------------------------------------------------------------------------|--------------------|----------------------------|-----------------------|-------|-------|--------|---------|
|                                    |                                     |                  | Top 10% GRS                                                                               | Rest of Population |                            | Estimate              | SE    | LCI   | UCI    | P-value |
| <b>Risk of hospitalization</b>     |                                     |                  |                                                                                           |                    |                            |                       |       |       |        |         |
| AncestryDNA EUR<br>N=6,626         | 0 to 2                              | 6,073            | 12.31                                                                                     | 6.11               | 6.20                       | 2.05                  | 0.141 | 1.555 | 2.703  | 3.8E-07 |
|                                    | 0                                   | 2,871            | 7.14                                                                                      | 4.5                | 2.64                       | 1.69                  | 0.252 | 1.031 | 2.769  | 0.038   |
|                                    | 1                                   | 2,228            | 14.22                                                                                     | 6.74               | 7.48                       | 2.11                  | 0.223 | 1.363 | 3.267  | 7.6E-04 |
|                                    | 2                                   | 974              | 25.00                                                                                     | 9.37               | 15.63                      | 3.00                  | 0.287 | 1.709 | 5.265  | 1.3E-04 |
|                                    | 3+                                  | 553              | 34.09                                                                                     | 19.45              | 14.64                      | 1.77                  | 0.364 | 0.867 | 3.613  | 0.118   |
| UKB EUR<br>N=1,797                 | 0 to 2                              | 1,182            | 71.77 (89/124)                                                                            | 52.36 (554/1058)   | 19.41                      | 2.49                  | 0.222 | 1.612 | 3.847  | 4.0E-05 |
|                                    | 0                                   | 301              | 47.06 (16/34)                                                                             | 34.08 (91/267)     | 12.98                      | 1.39                  | 0.397 | 0.638 | 3.027  | 0.404   |
|                                    | 1                                   | 471              | 75.47 (40/53)                                                                             | 51.67 (216/418)    | 23.80                      | 3.91                  | 0.370 | 1.893 | 8.075  | 2.3E-04 |
|                                    | 2                                   | 410              | 89.19 (33/37)                                                                             | 66.22 (247/373)    | 22.97                      | 5.32                  | 0.584 | 1.694 | 16.711 | 4.2E-03 |
|                                    | 3+                                  | 615              | 81.48 (44/54)                                                                             | 81.64 (458/561)    | -0.16                      | 0.98                  | 0.390 | 0.456 | 2.105  | 0.963   |
| Meta-analysis EUR<br>N=8,423       | 0 to 2                              | 7,255            | NA                                                                                        |                    |                            | 2.16                  | 0.119 | 1.714 | 2.732  | 8.4E-11 |
|                                    | 0                                   | 3,172            |                                                                                           |                    |                            | 1.60                  | 0.213 | 1.053 | 2.424  | 0.028   |
|                                    | 1                                   | 2,699            |                                                                                           |                    |                            | 2.49                  | 0.191 | 1.714 | 3.619  | 1.7E-06 |
|                                    | 2                                   | 1,384            |                                                                                           |                    |                            | 3.35                  | 0.257 | 2.026 | 5.555  | 2.6E-06 |
|                                    | 3+                                  | 1,168            |                                                                                           |                    |                            | 1.34                  | 0.266 | 0.798 | 2.264  | 0.267   |
| <b>Risk of severe disease</b>      |                                     |                  |                                                                                           |                    |                            |                       |       |       |        |         |
| AncestryDNA EUR<br>N=6,626         | 0 to 2                              | 6,073            | 5.23                                                                                      | 2.55               | 2.67                       | 1.99                  | 0.211 | 1.320 | 3.000  | 1.1E-03 |
|                                    | 0                                   | 2,871            | 1.7                                                                                       | 1.67               | 0.03                       | 1.09                  | 0.486 | 0.420 | 2.830  | 0.854   |
|                                    | 1                                   | 2,228            | 6.16                                                                                      | 2.58               | 3.58                       | 2.64                  | 0.338 | 1.360 | 5.120  | 4.0E-03 |
|                                    | 2                                   | 974              | 14.77                                                                                     | 5.08               | 9.69                       | 2.67                  | 0.356 | 1.330 | 5.360  | 5.9E-03 |
|                                    | 3+                                  | 553              | 18.18                                                                                     | 11.2               | 6.98                       | 1.30                  | 0.469 | 0.520 | 3.250  | 0.581   |
| UKB EUR<br>N=1,797                 | 0 to 2                              | 1,182            | 32.26 (40/124)                                                                            | 19.19 (203/1058)   | 13.07                      | 2.28                  | 0.227 | 1.460 | 3.560  | 2.8E-04 |
|                                    | 0                                   | 301              | 11.76 (4/34)                                                                              | 8.24 (22/267)      | 3.53                       | 1.48                  | 0.666 | 0.400 | 5.470  | 0.554   |
|                                    | 1                                   | 471              | 39.62 (21/53)                                                                             | 18.42 (77/418)     | 21.20                      | 4.06                  | 0.347 | 2.060 | 8.010  | 5.4E-05 |
|                                    | 2                                   | 410              | 40.54 (15/37)                                                                             | 27.88 (104/373)    | 12.66                      | 1.67                  | 0.416 | 0.740 | 3.780  | 2.2E-01 |
|                                    | 3+                                  | 615              | 40.74 (22/54)                                                                             | 36.90 (207/561)    | 3.84                       | 1.24                  | 0.320 | 0.660 | 2.320  | 0.504   |
| Meta-analysis EUR<br>N=8,423       | 0 to 2                              | 7,255            | NA                                                                                        |                    |                            | 2.12                  | 0.154 | 1.566 | 2.868  | 1.2E-06 |
|                                    | 0                                   | 3,172            |                                                                                           |                    |                            | 1.22                  | 0.393 | 0.563 | 2.624  | 0.619   |
|                                    | 1                                   | 2,699            |                                                                                           |                    |                            | 3.26                  | 0.242 | 2.027 | 5.233  | 1.1E-06 |
|                                    | 2                                   | 1,384            |                                                                                           |                    |                            | 2.19                  | 0.271 | 1.287 | 3.719  | 3.8E-03 |
|                                    | 3+                                  | 1,168            |                                                                                           |                    |                            | 1.26                  | 0.265 | 0.748 | 2.110  | 0.388   |

\* Age ≥ 65, Male, BMI > 30 (obese), plus any risk factor/comorbidity that had an age/sex adjusted nominal p-value < 0.1 in an analysis evaluating hospitalized yes/no or severe yes/no by risk factor,

\*\* Logistic regression model adjusted for ancestry-informative PCs and REGENIE genome-wide predictor to account for family structure.
